# Supplementary material
Source: PubMed Central journal article supplement (PMC154226)
Supplement: nar_31_9_2443__1.pdf [file nar_31_9_2443__1.pdf]

## Supplementary Material

| <b>Q-clique 1</b> | <b>Function Annotation</b>                                                               |
|-------------------|------------------------------------------------------------------------------------------|
| YLR244C           | [F] MAP1 methionine aminopeptidase, isoform 1                                            |
| YBR283C           | [F] SSH1 involved in co-translational pathway of protein transport                       |
| YBL091C           | [F] MAP2 methionine aminopeptidase, isoform 2                                            |
| YKL024C           | [M] URA6 uridine-monophosphate kinase                                                    |
| YDR226W           | [M] ADK1 adenylate kinase, cytosolic                                                     |
| YER170W           | [M] ADK2 adenylate kinase, mitochondrial                                                 |
| YLR378C           | [O] SEC61 ER protein-translocation complex subunit                                       |
| YDR117C           | [O] YDR117c similarity to mouse ligatin, a trafficking receptor for phosphoglycoproteins |
| YEL054C           | [P] RPL12A 60S large subunit ribosomal protein L12.e                                     |
| YGL135W           | [P] RPL1B 60S large subunit ribosomal protein                                            |
| YDL202W           | [P] MRPL11 ribosomal protein of the large subunit, mitochondrial                         |
| YJL177W           | [P] RPL17B 60s large subunit ribosomal protein L17.e                                     |
| YDR041W           | [P] RSM10 component of the mitochondrial ribosomal small subunit                         |
| YPR166C           | [P] MRP2 ribosomal protein S14                                                           |
| YOR063W           | [P] RPL3 60S large subunit ribosomal protein L3.e                                        |
| YPL131W           | [P] RPL5 60S large subunit ribosomal protein L5.e                                        |
| YPR102C           | [P] RPL11A ribosomal protein L11.e                                                       |
| YOL040C           | [P] RPS15 40S small subunit ribosomal protein                                            |
| YLR367W           | [P] RPS22B ribosomal protein S15a.e.c12                                                  |
| YOL127W           | [P] RPL25 ribosomal protein L23a.e                                                       |
| YGL147C           | [P] RPL9A ribosomal protein L9.e                                                         |
| YGL103W           | [P] RPL28 60S large subunit ribosomal protein L27a.e                                     |
| YDL136W           | [P] RPL35B 60S large subunit ribosomal protein                                           |
| YDL061C           | [P] RPS29B ribosomal protein S29.e.B                                                     |
| YHR147C           | [P] MRPL6 ribosomal protein of the large subunit, mitochondrial                          |
| YDL191W           | [P] RPL35A 60S large subunit ribosomal protein                                           |
| YIL133C           | [P] RPL16A 60S large subunit ribosomal protein                                           |
| YNL067W           | [P] RPL9B ribosomal protein L9.e.c14                                                     |
| YDR237W           | [P] MRPL7 ribosomal protein of the large subunit, mitochondrial                          |
| YJR145C           | [P] RPS4A ribosomal protein S4.e.c10                                                     |
| YBL027W           | [P] RPL19B 60S large subunit ribosomal protein L19.e                                     |
| YDL083C           | [P] RPS16B ribosomal protein S16.e                                                       |
| YEL050C           | [P] RML2 ribosomal L2 protein, mitochondrial                                             |
| YMR143W           | [P] RPS16A ribosomal protein S16.e                                                       |
| YBR251W           | [P] MRPS5 ribosomal protein S5, mitochondrial                                            |
| YNL069C           | [P] RPL16B 60S large subunit ribosomal protein                                           |
| YBL038W           | [P] MRPL16 ribosomal protein of the large subunit, mitochondrial                         |
| YLR388W           | [P] RPS29A ribosomal protein S29.e.A                                                     |
| YKL170W           | [P] MRPL38 ribosomal protein of the large subunit (L14), mitochondrial                   |
| YBR146W           | [P] MRPS9 ribosomal protein S9 precursor, mitochondrial                                  |
| YNL185C           | [P] MRPL19 ribosomal protein of the large subunit, mitochondrial                         |
| YCR031C           | [P] RPS14A 40S Ribosomal protein S14.e                                                   |
| YBR048W           | [P] RPS11B ribosomal protein S11.e.B                                                     |
| YDR012W           | [P] RPL4B ribosomal protein L4.e.B                                                       |
| YIL018W           | [P] RPL2B 60S large subunit ribosomal protein L8.e                                       |
| YJL191W           | [P] RPS14B 40S small subunit ribosomal protein S14.e.B                                   |
| YML025C           | [P] YML6 ribosomal protein, mitochondrial                                                |
| YBL092W           | [P] RPL32 60S large subunit ribosomal protein L32.e                                      |
| YJR123W           | [P] RPS5 ribosomal protein S5.e                                                          |
| YMR260C           | [P] TIF11 translation initiation factor eIF1a                                            |
| YNR036C           | [P] YNR036c strong similarity to ribosomal protein S12                                   |
| YJR113C           | [P] RSM7 similarity to bacterial, chloroplast and mitochondrial ribosomal protein S7     |
| YDR116C           | [P] YDR116c similarity to bacterial ribosomal L1 proteins                                |

|           |                                                                                       |
|-----------|---------------------------------------------------------------------------------------|
| YGR085C   | [P] RPL11B ribosomal protein                                                          |
| YGR034W   | [P] RPL26B 60S large subunit ribosomal protein                                        |
| YNL244C   | [P] SUI1 translation initiation factor 3 (eIF3)                                       |
| YNL178W   | [P] RPS3 ribosomal protein S3.e                                                       |
| YGR118W   | [P] RPS23A 40S small subunit ribosomal protein S23.e                                  |
| YJL063C   | [P] MRPL8 ribosomal protein L17, mitochondrial                                        |
| YGR220C   | [P] MRPL9 ribosomal protein YmL9, mitochondrial                                       |
| YMR188C   | [P] YMR188c weak similarity to bacterial ribosomal protein S17                        |
| YDR025W   | [P] RPS11A ribosomal protein S11.e                                                    |
| YJL190C   | [P] RPS22A ribosomal protein S15a.e.c10                                               |
| YNL284C   | [P] MRPL10 ribosomal protein of the large subunit, mitochondrial                      |
| YHR203C   | [P] RPS4B ribosomal protein S4.e.c8                                                   |
| YML026C   | [P] RPS18B ribosomal protein S18.e.c13                                                |
| YNL306W   | [P] MRPS18 ribosomal protein of the small subunit, mitochondrial                      |
| YGL068W   | [P] YGL068w strong similarity to Cricetus mitochondrial ribosomal L12 protein         |
| YPL220W   | [P] RPL1A ribosomal protein                                                           |
| YPR132W   | [P] RPS23B 40S small subunit ribosomal protein S23.e                                  |
| YPL183W-A | [P] YPL183w-a strong similarity to mitochondrial and bacterial ribosomal L36 proteins |
| YER117W   | [P] RPL23B ribosomal protein L23.e                                                    |
| YDR450W   | [P] RPS18A ribosomal protein S18.e.c4                                                 |
| YNR037C   | [P] RSM19 strong similarity to Mycoplasma ribosomal protein S19                       |
| YBR031W   | [P] RPL4A ribosomal protein                                                           |
| YDR418W   | [P] RPL12B 60S large subunit ribosomal protein L12.e                                  |
| YNL081C   | [P] YNL081c similarity to ribosomal protein S13                                       |
| YGL123W   | [P] RPS2 40S small subunit ribosomal protein                                          |
| YHL015W   | [P] RPS20 ribosomal protein                                                           |
| YBL087C   | [P] RPL23A 60S large subunit ribosomal protein L23.e                                  |
| YLR340W   | [P] RPP0 acidic ribosomal protein L10.e                                               |
| YKL180W   | [P] RPL17A ribosomal protein L17.e                                                    |
| YLR075W   | [P] RPL10 60S large subunit ribosomal protein                                         |
| YLR344W   | [P] RPL26A 60S large subunit ribosomal protein                                        |
| YML009C   | [P] MRPL39 60S ribosomal protein, mitochondrial                                       |
| YOR150W   | [P] MRPL23 ribosomal protein of the large subunit, mitochondrial                      |
| YBR084C-A | [P] RPL19A 60S large subunit ribosomal protein L19.e                                  |
| YNL292W   | [T] PUS4 pseudouridine synthase                                                       |
| YPR010C   | [T] RPA135 DNA-directed RNA polymerase I, 135 KD subunit                              |
| YOR116C   | [T] RPO31 DNA-directed RNA polymerase III, 160 KD subunit                             |
| YOR207C   | [T] RET1 DNA-directed RNA polymerase III, 130 KD subunit                              |
| YPL212C   | [T] PUS1 pseudouridine synthase 1                                                     |
| YIL021W   | [T] RPB3 DNA-directed RNA-polymerase II, 45 kDa                                       |
| YGL063W   | [T] PUS2 pseudouridine synthase 2                                                     |
| YPR110C   | [T] RPC40 DNA-directed RNA polymerase I, III 40 KD subunit                            |
| YFL001W   | [T] DEG1 pseudouridine synthase                                                       |
| YBR257W   | [T] POP4 involved in processing of tRNAs and rRNAs                                    |
| YLR175W   | [T] CBF5 putative rRNA pseuduridine synthase                                          |
| YML010W   | [T] SPT5 transcription elongation protein                                             |
| YOR151C   | [T] RPB2 DNA-directed RNA polymerase II, 140 kDa chain                                |
| YOR341W   | [T] RPA190 DNA-directed RNA polymerase I, 190 KD alpha subunit                        |
| YKL009W   | [T] MRT4 mRNA turnover 4                                                              |
| YDL140C   | [T] RPO21 DNA-directed RNA polymerase II, 215 KD subunit                              |
| YNL177C   | [U] YNL177c similarity to hypothetical protein S. pombe                               |
| YMR310C   | [U] YMR310c similarity to YGR283c                                                     |
| YJR014W   | [U] YJR014w strong similarity to S.pombe hypothetical protein SPBC16C6.05             |
| YMR158W   | [U] YMR158w weak similarity to E.coli ribosomal S8 protein                            |
| YGR283C   | [U] YGR283c similarity to hypothetical protein YMR310c                                |

|                   |                                                                                          |
|-------------------|------------------------------------------------------------------------------------------|
| YDR101C           | [U] YDR101c weak similarity to proliferation-associated protein                          |
| <b>Q-clique 2</b> | <b>Function Annotation</b>                                                               |
| YLR244C           | [F] MAP1 methionine aminopeptidase, isoform 1                                            |
| YBR283C           | [F] SSH1 involved in co-translational pathway of protein transport                       |
| YBL091C           | [F] MAP2 methionine aminopeptidase, isoform 2                                            |
| YER170W           | [M] ADK2 adenylate kinase, mitochondrial                                                 |
| YDR226W           | [M] ADK1 adenylate kinase, cytosolic                                                     |
| YKL024C           | [M] URA6 uridine-monophosphate kinase                                                    |
| YDR117C           | [O] YDR117c similarity to mouse ligatin, a trafficking receptor for phosphoglycoproteins |
| YLR378C           | [O] SEC61 ER protein-translocation complex subunit                                       |
| YEL054C           | [P] RPL12A 60S large subunit ribosomal protein L12.e                                     |
| YGL135W           | [P] RPL1B 60S large subunit ribosomal protein                                            |
| YDL202W           | [P] MRPL11 ribosomal protein of the large subunit, mitochondrial                         |
| YDR041W           | [P] RSM10 component of the mitochondrial ribosomal small subunit                         |
| YJL177W           | [P] RPL17B 60s large subunit ribosomal protein L17.e                                     |
| YDL136W           | [P] RPL35B 60S large subunit ribosomal protein                                           |
| YNL067W           | [P] RPL9B ribosomal protein L9.e.c14                                                     |
| YPR102C           | [P] RPL11A ribosomal protein L11.e                                                       |
| YOL040C           | [P] RPS15 40S small subunit ribosomal protein                                            |
| YOL127W           | [P] RPL25 ribosomal protein L23a.e                                                       |
| YLR367W           | [P] RPS22B ribosomal protein S15a.e.c12                                                  |
| YGL147C           | [P] RPL9A ribosomal protein L9.e                                                         |
| YGL103W           | [P] RPL28 60S large subunit ribosomal protein L27a.e                                     |
| YIL133C           | [P] RPL16A 60S large subunit ribosomal protein                                           |
| YHR147C           | [P] MRPL6 ribosomal protein of the large subunit, mitochondrial                          |
| YDL061C           | [P] RPS29B ribosomal protein S29.e.B                                                     |
| YDL191W           | [P] RPL35A 60S large subunit ribosomal protein                                           |
| YEL050C           | [P] RML2 ribosomal L2 protein, mitochondrial                                             |
| YLR388W           | [P] RPS29A ribosomal protein S29.e.A                                                     |
| YKL170W           | [P] MRPL38 ribosomal protein of the large subunit (L14), mitochondrial                   |
| YJR145C           | [P] RPS4A ribosomal protein S4.e.c10                                                     |
| YBL027W           | [P] RPL19B 60S large subunit ribosomal protein L19.e                                     |
| YDL083C           | [P] RPS16B ribosomal protein S16.e                                                       |
| YDR012W           | [P] RPL4B ribosomal protein L4.e.B                                                       |
| YMR143W           | [P] RPS16A ribosomal protein S16.e                                                       |
| YBR251W           | [P] MRPS5 ribosomal protein S5, mitochondrial                                            |
| YNL069C           | [P] RPL16B 60S large subunit ribosomal protein                                           |
| YBL038W           | [P] MRPL16 ribosomal protein of the large subunit, mitochondrial                         |
| YBR146W           | [P] MRPS9 ribosomal protein S9 precursor, mitochondrial                                  |
| YJL191W           | [P] RPS14B 40S small subunit ribosomal protein S14.e.B                                   |
| YNL185C           | [P] MRPL19 ribosomal protein of the large subunit, mitochondrial                         |
| YCR031C           | [P] RPS14A 40S Ribosomal protein S14.e                                                   |
| YBR048W           | [P] RPS11B ribosomal protein S11.e.B                                                     |
| YIL018W           | [P] RPL2B 60S large subunit ribosomal protein L8.e                                       |
| YML025C           | [P] YML6 ribosomal protein, mitochondrial                                                |
| YBL092W           | [P] RPL32 60S large subunit ribosomal protein L32.e                                      |
| YJR123W           | [P] RPS5 ribosomal protein S5.e                                                          |
| YJR113C           | [P] RSM7 similarity to bacterial, chloroplast and mitochondrial ribosomal protein S7     |
| YNR036C           | [P] YNR036c strong similarity to ribosomal protein S12                                   |
| YGR085C           | [P] RPL11B ribosomal protein                                                             |
| YGR034W           | [P] RPL26B 60S large subunit ribosomal protein                                           |
| YNL244C           | [P] SUI1 translation initiation factor 3 (eIF3)                                          |
| YNL178W           | [P] RPS3 ribosomal protein S3.e                                                          |
| YGR118W           | [P] RPS23A 40S small subunit ribosomal protein S23.e                                     |
| YGR220C           | [P] MRPL9 ribosomal protein YmL9, mitochondrial                                          |

|                   |                                                                                                         |
|-------------------|---------------------------------------------------------------------------------------------------------|
| YMR188C           | [P] YMR188c weak similarity to bacterial ribosomal protein S17                                          |
| YDR025W           | [P] RPS11A ribosomal protein S11.e                                                                      |
| YJL190C           | [P] RPS22A ribosomal protein S15a.e.c10                                                                 |
| YNL284C           | [P] MRPL10 ribosomal protein of the large subunit, mitochondrial                                        |
| YHR203C           | [P] RPS4B ribosomal protein S4.e.c8                                                                     |
| YML026C           | [P] RPS18B ribosomal protein S18.e.c13                                                                  |
| YNL306W           | [P] MRPS18 ribosomal protein of the small subunit, mitochondrial                                        |
| YPL220W           | [P] RPL1A ribosomal protein                                                                             |
| YPR132W           | [P] RPS23B 40S small subunit ribosomal protein S23.e                                                    |
| YER117W           | [P] RPL23B ribosomal protein L23.e                                                                      |
| YNR037C           | [P] RSM19 strong similarity to Mycoplasma ribosomal protein S19                                         |
| YBR031W           | [P] RPL4A ribosomal protein                                                                             |
| YDR450W           | [P] RPS18A ribosomal protein S18.e.c4                                                                   |
| YNL081C           | [P] YNL081c similarity to ribosomal protein S13                                                         |
| YGL123W           | [P] RPS2 40S small subunit ribosomal protein                                                            |
| YDR418W           | [P] RPL12B 60S large subunit ribosomal protein L12.e                                                    |
| YHL015W           | [P] RPS20 ribosomal protein                                                                             |
| YBL087C           | [P] RPL23A 60S large subunit ribosomal protein L23.e                                                    |
| YKL180W           | [P] RPL17A ribosomal protein L17.e                                                                      |
| YLR340W           | [P] RPP0 acidic ribosomal protein L10.e                                                                 |
| YLR075W           | [P] RPL10 60S large subunit ribosomal protein                                                           |
| YLR344W           | [P] RPL26A 60S large subunit ribosomal protein                                                          |
| YPR166C           | [P] MRP2 ribosomal protein S14                                                                          |
| YOR150W           | [P] MRPL23 ribosomal protein of the large subunit, mitochondrial                                        |
| YBR084C-A         | [P] RPL19A 60S large subunit ribosomal protein L19.e                                                    |
| YOR063W           | [P] RPL3 60S large subunit ribosomal protein L3.e                                                       |
| YBR257W           | [T] POP4 involved in processing of tRNAs and rRNAs                                                      |
| YOR341W           | [T] RPA190 DNA-directed RNA polymerase I, 190 KD alpha subunit                                          |
| YOR116C           | [T] RPO31 DNA-directed RNA polymerase III, 160 KD subunit                                               |
| YOR207C           | [T] RET1 DNA-directed RNA polymerase III, 130 KD subunit                                                |
| YPL212C           | [T] PUS1 pseudouridine synthase 1                                                                       |
| YIL021W           | [T] RPB3 DNA-directed RNA-polymerase II, 45 kDa                                                         |
| YGL063W           | [T] PUS2 pseudouridine synthase 2                                                                       |
| YFL001W           | [T] DEG1 pseudouridine synthase                                                                         |
| YPR110C           | [T] RPC40 DNA-directed RNA polymerase I, III 40 KD subunit                                              |
| YOR151C           | [T] RPB2 DNA-directed RNA polymerase II, 140 kDa chain                                                  |
| YML010W           | [T] SPT5 transcription elongation protein                                                               |
| YDL140C           | [T] RPO21 DNA-directed RNA polymerase II, 215 KD subunit                                                |
| YNL292W           | [T] PUS4 pseudouridine synthase                                                                         |
| YNL177C           | [U] YNL177c similarity to hypothetical protein <i>S. pombe</i>                                          |
| YMR310C           | [U] YMR310c similarity to YGR283c                                                                       |
| YJR014W           | [U] YJR014w strong similarity to <i>S.pombe</i> hypothetical protein SPBC16C6.05                        |
| YGR283C           | [U] YGR283c similarity to hypothetical protein YMR310c                                                  |
| YMR158W           | [U] YMR158w weak similarity to <i>E.coli</i> ribosomal S8 protein                                       |
| <b>Q-clique 3</b> | <b>Function Annotation</b>                                                                              |
| YNL132W           | [C] KRE33 similarity to <i>A.ambisexualis</i> antheridiol steroid receptor                              |
| YCR057C           | [C] PWP2 periodic tryptophan protein                                                                    |
| YMR128W           | [C] ECM16 putative DEAH-box RNA helicase                                                                |
| YGR245C           | [D] SDA1 required for normal organization of the actin cytoskeleton; required for passage through Start |
| YMR290C           | [D] HAS1 helicase associated with SET1P                                                                 |
| YLR129W           | [D] DIP2 DOM34P-interacting protein                                                                     |
| YPL126W           | [D] NAN1 weak similarity to fruit fly TFIID subunit p85                                                 |
| YOR272W           | [D] YTM1 microtubule-interacting protein                                                                |
| YLR449W           | [F] FPR4 nucleolar peptidylprolyl cis-trans isomerase (PPIase)                                          |

|         |                                                                                                                                                    |
|---------|----------------------------------------------------------------------------------------------------------------------------------------------------|
| YLR002C | [F] NOC3 required for maturation and intranuclear transport of pre-ribosomes                                                                       |
| YBR247C | [F] ENP1 effects N-glycosylation                                                                                                                   |
| YDR299W | [O] BFR2 involved in protein transport steps at the Brefeldin A blocks                                                                             |
| YOR206W | [O] NOC2 crucial for intranuclear movement of ribosomal precursor particles                                                                        |
| YER006W | [O] YER006w similarity to P.polycephalum myosin-related protein mlpA                                                                               |
| YDR060W | [P] MAK21 protein required for 60S ribosomal subunit biogenesis                                                                                    |
| YDL148C | [P] NOP14 nuclear and nucleolar protein with possible role in ribosome biogenesis                                                                  |
| YCL054W | [P] SPB1 required for ribosome synthesis, putative methylase                                                                                       |
| YPR016C | [P] TIF6 translation initiation factor 6 (eIF6)                                                                                                    |
| YLR197W | [T] SIK1 involved in pre-rRNA processing                                                                                                           |
| YDL031W | [T] DBP10 putative RNA helicase involved in ribosome biogenesis                                                                                    |
| YKL172W | [T] EBP2 required for pre-rRNA processing and ribosomal subunit assembly                                                                           |
| YPL217C | [T] BMS1 GTP-binding protein, required for distinct steps of 40S ribosome biogenesis                                                               |
| YDR087C | [T] RRP1 involved in processing rRNA precursor species to mature rRNAs                                                                             |
| YHR148W | [T] IMP3 component of the U3 small nucleolar ribonucleoprotein                                                                                     |
| YPL211W | [T] NIP7 required for efficient 60S ribosome subunit biogenesis                                                                                    |
| YLL011W | [T] SOF1 involved in 18S pre-rRNA production                                                                                                       |
| YPL043W | [T] NOP4 nucleolar protein                                                                                                                         |
| YLL008W | [T] DRS1 RNA helicase of the DEAD box family                                                                                                       |
| YJR002W | [T] MPP10 component of the U3 small nucleolar ribonucleoprotein                                                                                    |
| YGL019W | [T] CKB1 casein kinase II, beta subunit                                                                                                            |
| YDL014W | [T] NOP1 fibrillarin                                                                                                                               |
| YNL061W | [T] NOP2 nucleolar protein                                                                                                                         |
| YFL002C | [T] SPB4 ATP-dependent RNA helicase of DEAH box family                                                                                             |
| YKL009W | [T] MRT4 mRNA turnover 4                                                                                                                           |
| YGR145W | [U] YGR145w similarity to C.elegans hypothetical protein                                                                                           |
| YLR222C | [U] CST29 similarity to DIP2P                                                                                                                      |
| YER082C | [U] KRE31 similarity to M.sexata steroid regulated MNG10 protein                                                                                   |
| YGR090W | [U] YGR090w similarity to PIR:T40678 hypothetical protein SPBC776.08c S. pombe                                                                     |
| YGR128C | [U] YGR128c hypothetical protein                                                                                                                   |
| YDR449C | [U] YDR449c similarity to hypothetical protein S. pombe                                                                                            |
| YNR053C | [U] NOG2 strong similarity to human breast tumor associated autoantigen                                                                            |
| YMR049C | [U] ERB1 weak similarity to A.thaliana PRL1 protein                                                                                                |
| YHR088W | [U] RPF1 similarity to hypothetical protein YNL075w                                                                                                |
| YDR496C | [U] PUF6 similarity to hypothetical human and C.elegans proteins                                                                                   |
| YGL111W | [U] YGL111w weak similarity to hypothetical protein S. pombe                                                                                       |
| YLR186W | [U] EMG1 strong similarity to S.pombe hypothetical protein C18G6.07C                                                                               |
| YMR093W | [U] YMR093w weak similarity to PWP2P                                                                                                               |
| YNL182C | [U] YNL182c weak similarity to S.pombe hypothetical protein                                                                                        |
| YOL077C | [U] BRX1 strong similarity to C.elegans K12H4.3 protein                                                                                            |
| YDR101C | [U] YDR101c weak similarity to proliferation-associated protein                                                                                    |
| YKL014C | [U] YKL014c similarity to hypothetical protein SPCC14G10.02 S. pombe                                                                               |
| YPL012W | [U] RRP12 hypothetical protein                                                                                                                     |
| YDR324C | [U] YDR324c weak similarity to beta transducin from S. pombe and other WD-40 repeat containing proteins                                            |
| YPR144C | [U] YPR144c similarity to YDR060w and C.elegans hypothetical protein                                                                               |
| YPL093W | [U] NOG1 similarity to M.jannaschii GTP-binding protein                                                                                            |
| YNL002C | [U] RLP7 strong similarity to mammalian ribosomal L7 proteins                                                                                      |
| YHR052W | [U] CIC1 adaptor protein specifically linking the 26S proteasome to its substrate, the SCF component CDC4                                          |
| YOL041C | [U] NOP12 weak similarity to M.sativa NUM1, hnRNP protein from C. tentans and D. melanogaster, murine/bovine poly(A) binding protein II, and NSR1P |
| YKR060W | [U] YKR060w similarity to hypothetical protein S. pombe                                                                                            |
| YGR103W | [U] RRP13 similarity to zebrafish essential for embryonic development gene pescadillo                                                              |
| YBL004W | [U] YBL004w weak similarity to Papaya ringspot virus polyprotein                                                                                   |

|                   |                                                                                                                                                                          |
|-------------------|--------------------------------------------------------------------------------------------------------------------------------------------------------------------------|
| YHR197W           | [U] YHR197w weak similarity to PIR:T22172 hypothetical protein F44E5.2 <i>C. elegans</i>                                                                                 |
| YLR409C           | [U] YLR409c strong similarity to <i>S. pombe</i> beta-transducin                                                                                                         |
| YLR276C           | [U] DBP9 similarity to YDL031w, MAK5P and RNA helicases                                                                                                                  |
| YKR081C           | [U] YKR081c strong similarity to hypothetical protein <i>S. pombe</i>                                                                                                    |
| YER126C           | [U] KRE32 weak similarity to <i>E.coli</i> colicin N                                                                                                                     |
| YJL109C           | [U] YJL109c weak similarity to ATPase DRS2P                                                                                                                              |
| YNL110C           | [U] YNL110c weak similarity to fruit fly RNA-binding protein                                                                                                             |
| <b>Q-clique 4</b> | <b>Function Annotation</b>                                                                                                                                               |
| YHR066W           | [C] SSF1 mating protein                                                                                                                                                  |
| YGR245C           | [D] SDA1 required for normal organization of the actin cytoskeleton; required for passage through Start                                                                  |
| YMR290C           | [D] HAS1 helicase associated with SET1P                                                                                                                                  |
| YOR272W           | [D] YTM1 microtubule-interacting protein                                                                                                                                 |
| YLR449W           | [F] FPR4 nucleolar peptidylprolyl cis-trans isomerase (PPIase)                                                                                                           |
| YLR002C           | [F] NOC3 required for maturation and intranuclear transport of pre-ribosomes                                                                                             |
| YOR206W           | [O] NOC2 crucial for intranuclear movement of ribosomal precursor particles                                                                                              |
| YER006W           | [O] YER006w similarity to <i>P.polycephalum</i> myosin-related protein mlpA                                                                                              |
| YPR016C           | [P] TIF6 translation initiation factor 6 (eIF6)                                                                                                                          |
| YDR060W           | [P] MAK21 protein required for 60S ribosomal subunit biogenesis                                                                                                          |
| YCL054W           | [P] SPB1 required for ribosome synthesis, putative methylase                                                                                                             |
| YNL061W           | [T] NOP2 nucleolar protein                                                                                                                                               |
| YKL172W           | [T] EBP2 required for pre-rRNA processing and ribosomal subunit assembly                                                                                                 |
| YPL043W           | [T] NOP4 nucleolar protein                                                                                                                                               |
| YDL031W           | [T] DBP10 putative RNA helicase involved in ribosome biogenesis                                                                                                          |
| YFL002C           | [T] SPB4 ATP-dependent RNA helicase of DEAH box family                                                                                                                   |
| YKL009W           | [T] MRT4 mRNA turnover 4                                                                                                                                                 |
| YLL008W           | [T] DRS1 RNA helicase of the DEAD box family                                                                                                                             |
| YDR087C           | [T] RRP1 involved in processing rRNA precursor species to mature rRNAs                                                                                                   |
| YDL051W           | [T] LHP1 RNA binding protein                                                                                                                                             |
| YPL211W           | [T] NIP7 required for efficient 60S ribosome subunit biogenesis                                                                                                          |
| YBR142W           | [T] MAK5 ATP-dependent RNA helicase                                                                                                                                      |
| YNL182C           | [U] YNL182c weak similarity to <i>S.pombe</i> hypothetical protein                                                                                                       |
| YLR106C           | [U] YLR106c similarity to Kaposi's sarcoma-associated herpes-like virus ORF73 homolog gene                                                                               |
| YFR001W           | [U] LOC1 weak similarity to rabbit triadin SPP41P                                                                                                                        |
| YKR081C           | [U] YKR081c strong similarity to hypothetical protein <i>S. pombe</i>                                                                                                    |
| YNL110C           | [U] YNL110c weak similarity to fruit fly RNA-binding protein                                                                                                             |
| YDR496C           | [U] PUF6 similarity to hypothetical human and <i>C.elegans</i> proteins                                                                                                  |
| YDR101C           | [U] YDR101c weak similarity to proliferation-associated protein                                                                                                          |
| YOL077C           | [U] BRX1 strong similarity to <i>C.elegans</i> K12H4.3 protein                                                                                                           |
| YHR197W           | [U] YHR197w weak similarity to PIR:T22172 hypothetical protein F44E5.2 <i>C. elegans</i>                                                                                 |
| YKL014C           | [U] YKL014c similarity to hypothetical protein SPCC14G10.02 <i>S. pombe</i>                                                                                              |
| YGR103W           | [U] RRP13 similarity to zebrafish essential for embryonic development gene pescadillo                                                                                    |
| YGL111W           | [U] YGL111w weak similarity to hypothetical protein <i>S. pombe</i>                                                                                                      |
| YPL093W           | [U] NOG1 similarity to <i>M.jannaschii</i> GTP-binding protein                                                                                                           |
| YOL041C           | [U] NOP12 weak similarity to <i>M.sativa</i> NUM1, hnRNP protein from <i>C. tentans</i> and <i>D. melanogaster</i> , murine/bovine poly(A) binding protein II, and NSR1P |
| YHR052W           | [U] CIC1 adaptor protein specifically linking the 26S proteasome to its substrate, the SCF component CDC4                                                                |
| YNL002C           | [U] RLP7 strong similarity to mammalian ribosomal L7 proteins                                                                                                            |
| YHR088W           | [U] RPF1 similarity to hypothetical protein YNL075w                                                                                                                      |
| YMR049C           | [U] ERB1 weak similarity to <i>A.thaliana</i> PRL1 protein                                                                                                               |
| YPL012W           | [U] RRP12 hypothetical protein                                                                                                                                           |
| YNR053C           | [U] NOG2 strong similarity to human breast tumor associated autoantigen                                                                                                  |
| YLR276C           | [U] DBP9 similarity to YDL031w, MAK5P and RNA helicases                                                                                                                  |

|                   |                                                                                                         |
|-------------------|---------------------------------------------------------------------------------------------------------|
| YER126C           | [U] KRE32 weak similarity to E.coli colicin N                                                           |
| <b>Q-clique 5</b> | <b>Function Annotation</b>                                                                              |
| YNL132W           | [C] KRE33 similarity to A.ambisexualis antheridiol steroid receptor                                     |
| YMR128W           | [C] ECM16 putative DEAH-box RNA helicase                                                                |
| YCR057C           | [C] PWP2 periodic tryptophan protein                                                                    |
| YLR129W           | [D] DIP2 DOM34P-interacting protein                                                                     |
| YPL126W           | [D] NAN1 weak similarity to fruit fly TFIID subunit p85                                                 |
| YBR247C           | [F] ENP1 effects N-glycosylation                                                                        |
| YDR299W           | [O] BFR2 involved in protein transport steps at the Brefeldin A blocks                                  |
| YDL148C           | [P] NOP14 nuclear and nucleolar protein with possible role in ribosome biogenesis                       |
| YPL217C           | [T] BMS1 GTP-binding protein, required for distinct steps of 40S ribosome biogenesis                    |
| YDL014W           | [T] NOP1 fibrillar                                                                                      |
| YLL011W           | [T] SOF1 involved in 18S pre-rRNA production                                                            |
| YOR061W           | [T] CKA2 casein kinase II alpha' chain                                                                  |
| YLR197W           | [T] SIK1 involved in pre-rRNA processing                                                                |
| YER127W           | [T] LCP5 NGG1P interacting protein                                                                      |
| YIL035C           | [T] CKA1 casein kinase II, catalytic alpha chain                                                        |
| YHR148W           | [T] IMP3 component of the U3 small nucleolar ribonucleoprotein                                          |
| YOR039W           | [T] CKB2 casein kinase II beta' chain                                                                   |
| YJR002W           | [T] MPP10 component of the U3 small nucleolar ribonucleoprotein                                         |
| YGL019W           | [T] CKB1 casein kinase II, beta subunit                                                                 |
| YPR144C           | [U] YPR144c similarity to YDR060w and C.elegans hypothetical protein                                    |
| YGR145W           | [U] YGR145w similarity to C.elegans hypothetical protein                                                |
| YLR222C           | [U] CST29 similarity to DIP2P                                                                           |
| YGR090W           | [U] YGR090w similarity to PIR:T40678 hypothetical protein SPBC776.08c S. pombe                          |
| YER082C           | [U] KRE31 similarity to M.sexata steroid regulated MNG10 protein                                        |
| YLR186W           | [U] EMG1 strong similarity to S.pombe hypothetical protein C18G6.07C                                    |
| YKR060W           | [U] YKR060w similarity to hypothetical protein S. pombe                                                 |
| YJL069C           | [U] YJL069c similarity to C.elegans hypothetical protein                                                |
| YBL004W           | [U] YBL004w weak similarity to Papaya ringspot virus polyprotein                                        |
| YLR409C           | [U] YLR409c strong similarity to S. pombe beta-transducin                                               |
| YGR128C           | [U] YGR128c hypothetical protein                                                                        |
| YMR093W           | [U] YMR093w weak similarity to PWP2P                                                                    |
| YDR449C           | [U] YDR449c similarity to hypothetical protein S. pombe                                                 |
| YKL099C           | [U] YKL099c similarity to C.elegans hypothetical proteins C18G6.06 and C16C10.2                         |
| YHR196W           | [U] YHR196w weak similarity to YDR398w                                                                  |
| YJL109C           | [U] YJL109c weak similarity to ATPase DRS2P                                                             |
| YDR324C           | [U] YDR324c weak similarity to beta transducin from S. pombe and other WD-40 repeat containing proteins |
| YOR145C           | [U] YOR145c strong similarity to hypothetical S. pombe protein and to hypothetical C. elegans protein   |
| <b>Q-clique 6</b> | <b>Function Annotation</b>                                                                              |
| YDR117C           | [O] YDR117c similarity to mouse ligatin, a trafficking receptor for phosphoglycoproteins                |
| YJL177W           | [P] RPL17B 60s large subunit ribosomal protein L17.e                                                    |
| YDR025W           | [P] RPS11A ribosomal protein S11.e                                                                      |
| YNL244C           | [P] SUI1 translation initiation factor 3 (eIF3)                                                         |
| YJL190C           | [P] RPS22A ribosomal protein S15a.e.c10                                                                 |
| YDR012W           | [P] RPL4B ribosomal protein L4.e.B                                                                      |
| YHR203C           | [P] RPS4B ribosomal protein S4.e.c8                                                                     |
| YER117W           | [P] RPL23B ribosomal protein L23.e                                                                      |
| YPR102C           | [P] RPL11A ribosomal protein L11.e                                                                      |
| YLR367W           | [P] RPS22B ribosomal protein S15a.e.c12                                                                 |
| YGL147C           | [P] RPL9A ribosomal protein L9.e                                                                        |
| YBR031W           | [P] RPL4A ribosomal protein                                                                             |
| YDL061C           | [P] RPS29B ribosomal protein S29.e.B                                                                    |

|                   |                                                                                                      |
|-------------------|------------------------------------------------------------------------------------------------------|
| YHR147C           | [P] MRPL6 ribosomal protein of the large subunit, mitochondrial                                      |
| YBL087C           | [P] RPL23A 60S large subunit ribosomal protein L23.e                                                 |
| YKL180W           | [P] RPL17A ribosomal protein L17.e                                                                   |
| YBL027W           | [P] RPL19B 60S large subunit ribosomal protein L19.e                                                 |
| YJR145C           | [P] RPS4A ribosomal protein S4.e.c10                                                                 |
| YBR048W           | [P] RPS11B ribosomal protein S11.e.B                                                                 |
| YML025C           | [P] YML6 ribosomal protein, mitochondrial                                                            |
| YBL092W           | [P] RPL32 60S large subunit ribosomal protein L32.e                                                  |
| YBR084C-A         | [P] RPL19A 60S large subunit ribosomal protein L19.e                                                 |
| YPR166C           | [P] MRP2 ribosomal protein S14                                                                       |
| YNL067W           | [P] RPL9B ribosomal protein L9.e.c14                                                                 |
| YDR237W           | [P] MRPL7 ribosomal protein of the large subunit, mitochondrial                                      |
| YGR085C           | [P] RPL11B ribosomal protein                                                                         |
| YLR388W           | [P] RPS29A ribosomal protein S29.e.A                                                                 |
| YKL170W           | [P] MRPL38 ribosomal protein of the large subunit (L14), mitochondrial                               |
| YBR257W           | [T] POP4 involved in processing of tRNAs and rRNAs                                                   |
| YNL177C           | [U] YNL177c similarity to hypothetical protein S. pombe                                              |
| YMR310C           | [U] YMR310c similarity to YGR283c                                                                    |
| YJR014W           | [U] YJR014w strong similarity to S.pombe hypothetical protein SPBC16C6.05                            |
| YMR158W           | [U] YMR158w weak similarity to E.coli ribosomal S8 protein                                           |
| YGR283C           | [U] YGR283c similarity to hypothetical protein YMR310c                                               |
| <b>Q-clique 7</b> | <b>Function Annotation</b>                                                                           |
| YGL151W           | [B] NUT1 negative transcription regulator from artificial reporters                                  |
| YHR058C           | [B] MED6 RNA polymerase II transcriptional regulation mediator                                       |
| YOL135C           | [B] MED7 member of RNA Polymerase II transcriptional regulation mediator complex                     |
| YPR168W           | [B] NUT2 negative transcription regulator from artificial reporters                                  |
| YGL025C           | [B] PGD1 mediator complex subunit                                                                    |
| YOL148C           | [B] SPT20 member of the TBP class of SPT proteins that alter transcription site selection            |
| YNL236W           | [B] SIN4 global regulator protein                                                                    |
| YML007W           | [B] YAP1 transcriptional activator involved in oxidative stress response                             |
| YGL127C           | [B] SOH1 allows HPR1 null mutant to grow at 37 deg.                                                  |
| YPL042C           | [D] SSN3 cyclin-dependent CTD kinase                                                                 |
| YMR112C           | [T] MED11 mediator complex subunit                                                                   |
| YDR443C           | [T] SSN2 DNA-directed RNA polymerase II holoenzyme and Srb10 CDK subcomplex subunit                  |
| YER022W           | [T] SRB4 DNA-directed RNA polymerase II holoenzyme and Kornberg's mediator (SRB) subcomplex subunit  |
| YHR041C           | [T] SRB2 DNA-directed RNA polymerase II holoenzyme and Kornberg's mediator (SRB) subcomplex subunit  |
| YLR071C           | [T] RGR1 DNA-directed RNA polymerase II holoenzyme subunit                                           |
| YPR070W           | [T] MED1 component of RNA polymerase II holoenzyme and mediator subcomplex                           |
| YCR081W           | [T] SRB8 DNA-directed RNA polymerase II holoenzyme and Srb10 CDK subcomplex subunit                  |
| YOL051W           | [T] GAL11 DNA-directed RNA polymerase II holoenzyme and Kornberg's mediator (SRB) subcomplex subunit |
| YDR308C           | [T] SRB7 DNA-directed RNA polymerase II holoenzyme and kornberg's mediator (SRB) subcomplex subunit  |
| YNR010W           | [T] CSE2 subunit of RNA polymerase II mediator complex                                               |
| YOR174W           | [T] MED4 transcription regulation mediator                                                           |
| YGR104C           | [T] SRB5 DNA-directed RNA polymerase II holoenzyme and Kornberg's mediator (SRB) subcomplex subunit  |
| YBR193C           | [T] MED8 transcriptional regulation mediator                                                         |
| YBR253W           | [T] SRB6 DNA-directed RNA polymerase II suppressor protein                                           |
| <b>Q-clique 8</b> | <b>Function Annotation</b>                                                                           |
| YLR117C           | [D] CLF1 strong similarity to Drosophila putative cell cycle control protein crn                     |



|                   |                                                                                                    |
|-------------------|----------------------------------------------------------------------------------------------------|
| YDR364C           | [D] CDC40 cell division control protein                                                            |
| YML049C           | [O] RSE1 involved in RNA splicing and ER to Golgi transport                                        |
| YKL173W           | [P] SNU114 U5 snRNP-specific protein                                                               |
| YGL128C           | [R] YGL128c weak similarity to dnaJ proteins                                                       |
| YLR298C           | [T] YHC1 associated with the U1 snRNP complex                                                      |
| YGR074W           | [T] SMD1 snRNA-associated protein                                                                  |
| YLL036C           | [T] PRP19 non-snRNP spliceosome component required for DNA repair                                  |
| YPL178W           | [T] CBC2 small subunit of the nuclear cap-binding protein complex CBC                              |
| YJL203W           | [T] PRP21 pre-mRNA splicing factor                                                                 |
| YBR055C           | [T] PRP6 snRNP(U4/U6)-associated splicing factor                                                   |
| YGR013W           | [T] SNU71 associated with U1 snRNP, no counterpart in mammalian U1 snRNP                           |
| YPL213W           | [T] LEA1 U2 A' snRNP protein                                                                       |
| YHR086W           | [T] NAM8 meiotic recombination protein                                                             |
| YDR416W           | [T] SYF1 synthetic lethal with CDC40                                                               |
| YDL043C           | [T] PRP11 pre-mRNA splicing factor                                                                 |
| YDR240C           | [T] SNU56 U1 snRNA protein, no counterpart in mammalian snRNP                                      |
| YIL061C           | [T] SNP1 U1 small nuclear ribonucleoprotein                                                        |
| YMR288W           | [T] HSH155 component of a multiprotein splicing factor                                             |
| YAL032C           | [T] PRP45 pre-mRNA splicing factor                                                                 |
| YER029C           | [T] SMB1 associated with U1 snRNP as part of the Sm-core that is common to all spliceosomal snRNPs |
| YGL120C           | [T] PRP43 involved in spliceosome disassembly                                                      |
| YMR125W           | [T] STO1 large subunit of the nuclear cap-binding protein complex CBC                              |
| YDL030W           | [T] PRP9 pre-mRNA splicing factor (snRNA-associated protein)                                       |
| YBR119W           | [T] MUD1 U1 snRNP-specific A protein                                                               |
| YGR091W           | [T] PRP31 pre-mRNA splicing protein                                                                |
| YML046W           | [T] PRP39 pre-mRNA splicing factor                                                                 |
| YPR178W           | [T] PRP4 U4/U6 snRNP 52 KD protein                                                                 |
| YKL012W           | [T] PRP40 splicing factor                                                                          |
| YDL087C           | [T] LUC7 yeast U1 snRNP protein with a role in 5' splice site recognition                          |
| YMR240C           | [T] CUS1 U2 snRNP protein                                                                          |
| YLR275W           | [T] SMD2 U1 snRNP protein of the Sm class                                                          |
| YOR308C           | [T] SNU66 component of U4/U6.U5 snRNP                                                              |
| YLR147C           | [T] SMD3 spliceosomal snRNA-associated Sm core protein required for pre-mRNA splicing              |
| YDR235W           | [T] PRP42 U1 snRNP associated protein, required for pre-mRNA splicing                              |
| YPR101W           | [T] SNT309 splicing factor                                                                         |
| YGR278W           | [U] YGR278w similarity to C.elegans LET-858                                                        |
| YDL209C           | [U] YDL209c similarity to hypothetical S. pombe protein                                            |
| YPL151C           | [U] PRP46 strong similarity to A.thaliana PRL1 and PRL2 proteins                                   |
| YLR424W           | [U] YLR424w weak similarity to STU1P                                                               |
| <b>Q-clique 9</b> | <b>Function Annotation</b>                                                                         |
| YMR128W           | [C] ECM16 putative DEAH-box RNA helicase                                                           |
| YNL132W           | [C] KRE33 similarity to A.ambisexualis antheridiol steroid receptor                                |
| YCR057C           | [C] PWP2 periodic tryptophan protein                                                               |
| YPL126W           | [D] NAN1 weak similarity to fruit fly TFIID subunit p85                                            |
| YLR129W           | [D] DIP2 DOM34P-interacting protein                                                                |
| YBR247C           | [F] ENP1 effects N-glycosylation                                                                   |
| YDR299W           | [O] BFR2 involved in protein transport steps at the Brefeldin A blocks                             |
| YDL148C           | [P] NOP14 nuclear and nucleolar protein with possible role in ribosome biogenesis                  |
| YHR148W           | [T] IMP3 component of the U3 small nucleolar ribonucleoprotein                                     |
| YLL011W           | [T] SOF1 involved in 18S pre-rRNA production                                                       |
| YOR061W           | [T] CKA2 casein kinase II alpha' chain                                                             |
| YER127W           | [T] LCP5 NGG1P interacting protein                                                                 |
| YIL035C           | [T] CKA1 casein kinase II, catalytic alpha chain                                                   |

|                    |                                                                                                         |
|--------------------|---------------------------------------------------------------------------------------------------------|
| YOR039W            | [T] CKB2 casein kinase II beta' chain                                                                   |
| YPL217C            | [T] BMS1 GTP-binding protein, required for distinct steps of 40S ribosome biogenesis                    |
| YJR002W            | [T] MPP10 component of the U3 small nucleolar ribonucleoprotein                                         |
| YGL019W            | [T] CKB1 casein kinase II, beta subunit                                                                 |
| YOR145C            | [U] YOR145c strong similarity to hypothetical S. pombe protein and to hypothetical C. elegans protein   |
| YPR144C            | [U] YPR144c similarity to YDR060w and C.elegans hypothetical protein                                    |
| YLR222C            | [U] CST29 similarity to DIP2P                                                                           |
| YOL077C            | [U] BRX1 strong similarity to C.elegans K12H4.3 protein                                                 |
| YGR090W            | [U] YGR090w similarity to PIR:T40678 hypothetical protein SPBC776.08c S. pombe                          |
| YER082C            | [U] KRE31 similarity to M.sexata steroid regulated MNG10 protein                                        |
| YLR186W            | [U] EMG1 strong similarity to S.pombe hypothetical protein C18G6.07C                                    |
| YKR060W            | [U] YKR060w similarity to hypothetical protein S. pombe                                                 |
| YLR409C            | [U] YLR409c strong similarity to S. pombe beta-transducin                                               |
| YJL069C            | [U] YJL069c similarity to C.elegans hypothetical protein                                                |
| YGR128C            | [U] YGR128c hypothetical protein                                                                        |
| YMR093W            | [U] YMR093w weak similarity to PWP2P                                                                    |
| YDR449C            | [U] YDR449c similarity to hypothetical protein S. pombe                                                 |
| YHR196W            | [U] YHR196w weak similarity to YDR398w                                                                  |
| YJL109C            | [U] YJL109c weak similarity to ATPase DRS2P                                                             |
| YKL099C            | [U] YKL099c similarity to C.elegans hypothetical proteins C18G6.06 and C16C10.2                         |
| YDR324C            | [U] YDR324c weak similarity to beta transducin from S. pombe and other WD-40 repeat containing proteins |
| <b>Q-clique 10</b> | <b>Function Annotation</b>                                                                              |
| YBR283C            | [F] SSH1 involved in co-translational pathway of protein transport                                      |
| YLR378C            | [O] SEC61 ER protein-translocation complex subunit                                                      |
| YDR117C            | [O] YDR117c similarity to mouse ligatin, a trafficking receptor for phosphoglycoproteins                |
| YGR220C            | [P] MRPL9 ribosomal protein YmL9, mitochondrial                                                         |
| YMR188C            | [P] YMR188c weak similarity to bacterial ribosomal protein S17                                          |
| YJL177W            | [P] RPL17B 60s large subunit ribosomal protein L17.e                                                    |
| YDR025W            | [P] RPS11A ribosomal protein S11.e                                                                      |
| YDR012W            | [P] RPL4B ribosomal protein L4.e.B                                                                      |
| YJL190C            | [P] RPS22A ribosomal protein S15a.e.c10                                                                 |
| YNL284C            | [P] MRPL10 ribosomal protein of the large subunit, mitochondrial                                        |
| YHR203C            | [P] RPS4B ribosomal protein S4.e.c8                                                                     |
| YPL131W            | [P] RPL5 60S large subunit ribosomal protein L5.e                                                       |
| YOL040C            | [P] RPS15 40S small subunit ribosomal protein                                                           |
| YER117W            | [P] RPL23B ribosomal protein L23.e                                                                      |
| YPR102C            | [P] RPL11A ribosomal protein L11.e                                                                      |
| YLR367W            | [P] RPS22B ribosomal protein S15a.e.c12                                                                 |
| YGL103W            | [P] RPL28 60S large subunit ribosomal protein L27a.e                                                    |
| YGL147C            | [P] RPL9A ribosomal protein L9.e                                                                        |
| YNR037C            | [P] RSM19 strong similarity to Mycoplasma ribosomal protein S19                                         |
| YBR031W            | [P] RPL4A ribosomal protein                                                                             |
| YDL061C            | [P] RPS29B ribosomal protein S29.e.B                                                                    |
| YHR147C            | [P] MRPL6 ribosomal protein of the large subunit, mitochondrial                                         |
| YDL191W            | [P] RPL35A 60S large subunit ribosomal protein                                                          |
| YGL123W            | [P] RPS2 40S small subunit ribosomal protein                                                            |
| YBL087C            | [P] RPL23A 60S large subunit ribosomal protein L23.e                                                    |
| YKL180W            | [P] RPL17A ribosomal protein L17.e                                                                      |
| YBL027W            | [P] RPL19B 60S large subunit ribosomal protein L19.e                                                    |
| YJR145C            | [P] RPS4A ribosomal protein S4.e.c10                                                                    |
| YBR251W            | [P] MRPS5 ribosomal protein S5, mitochondrial                                                           |
| YLR344W            | [P] RPL26A 60S large subunit ribosomal protein                                                          |
| YBR048W            | [P] RPS11B ribosomal protein S11.e.B                                                                    |

|                    |                                                                                      |
|--------------------|--------------------------------------------------------------------------------------|
| YIL018W            | [P] RPL2B 60S large subunit ribosomal protein L8.e                                   |
| YML025C            | [P] YML6 ribosomal protein, mitochondrial                                            |
| YBL092W            | [P] RPL32 60S large subunit ribosomal protein L32.e                                  |
| YBR084C-A          | [P] RPL19A 60S large subunit ribosomal protein L19.e                                 |
| YPR166C            | [P] MRP2 ribosomal protein S14                                                       |
| YDL136W            | [P] RPL35B 60S large subunit ribosomal protein                                       |
| YOR063W            | [P] RPL3 60S large subunit ribosomal protein L3.e                                    |
| YNL067W            | [P] RPL9B ribosomal protein L9.e.c14                                                 |
| YDR237W            | [P] MRPL7 ribosomal protein of the large subunit, mitochondrial                      |
| YGR085C            | [P] RPL11B ribosomal protein                                                         |
| YEL050C            | [P] RML2 ribosomal L2 protein, mitochondrial                                         |
| YGR034W            | [P] RPL26B 60S large subunit ribosomal protein                                       |
| YLR388W            | [P] RPS29A ribosomal protein S29.e.A                                                 |
| YKL170W            | [P] MRPL38 ribosomal protein of the large subunit (L14), mitochondrial               |
| YNL244C            | [P] SUI1 translation initiation factor 3 (eIF3)                                      |
| YNL292W            | [T] PUS4 pseudouridine synthase                                                      |
| YLR175W            | [T] CBF5 putative rRNA pseuduridine synthase                                         |
| YBR257W            | [T] POP4 involved in processing of tRNAs and rRNAs                                   |
| YJR014W            | [U] YJR014w strong similarity to S.pombe hypothetical protein SPBC16C6.05            |
| YMR310C            | [U] YMR310c similarity to YGR283c                                                    |
| YNL177C            | [U] YNL177c similarity to hypothetical protein S. pombe                              |
| YGR283C            | [U] YGR283c similarity to hypothetical protein YMR310c                               |
| YMR158W            | [U] YMR158w weak similarity to E.coli ribosomal S8 protein                           |
| <b>Q-clique 11</b> | <b>Function Annotation</b>                                                           |
| YHL030W            | [C] ECM29 involved in cell wall biogenesis and architecture                          |
| YBR272C            | [D] HSM3 mismatch repair protein                                                     |
| YOR259C            | [F] RPT4 26S proteasome regulatory subunit                                           |
| YOR117W            | [F] RPT5 26S proteasome regulatory subunit                                           |
| YFR052W            | [F] RPN12 26S proteasome regulatory subunit                                          |
| YGL011C            | [F] SCL1 20S proteasome subunit YC7ALPHA/Y8 (alpha1)                                 |
| YDR427W            | [F] RPN9 subunit of the regulatory particle of the proteasome                        |
| YOR261C            | [F] RPN8 26S proteasome regulatory subunit                                           |
| YER012W            | [F] PRE1 20S proteasome subunit C11(beta4)                                           |
| YMR314W            | [F] PRE5 20S proteasome subunit(alpha6)                                              |
| YER021W            | [F] RPN3 26S proteasome regulatory subunit                                           |
| YDL007W            | [F] RPT2 26S proteasome regulatory subunit                                           |
| YDR394W            | [F] RPT3 26S proteasome regulatory subunit                                           |
| YFR004W            | [F] RPN11 26S proteasome regulatory subunit                                          |
| YGL048C            | [F] RPT6 26S proteasome regulatory subunit                                           |
| YPR108W            | [F] RPN7 subunit of the regulatory particle of the proteasome                        |
| YDL147W            | [F] RPN5 subunit of the regulatory particle of the proteasome                        |
| YHR200W            | [F] RPN10 26S proteasome regulatory subunit                                          |
| YDL097C            | [F] RPN6 subunit of the regulatory particle of the proteasome                        |
| YKL145W            | [F] RPT1 26S proteasome regulatory subunit                                           |
| YGR232W            | [F] NAS6 possible homolog of human 26S proteasome regulatory subunit p28             |
| YJR109C            | [G] CPA2 arginine-specific carbamoylphosphate synthase, large chain                  |
| YKL104C            | [M] GFA1 glucosamine--fructose-6-phosphate transaminase                              |
| YLR421C            | [U] RPN13 weak similarity to human 42K membrane glycoprotein                         |
| <b>Q-clique 12</b> | <b>Function Annotation</b>                                                           |
| YML054C            | [E] CYB2 lactate dehydrogenase cytochrome b2                                         |
| YMR208W            | [M] ERG12 mevalonate kinase                                                          |
| YJL063C            | [P] MRPL8 ribosomal protein L17, mitochondrial                                       |
| YJR113C            | [P] RSM7 similarity to bacterial, chloroplast and mitochondrial ribosomal protein S7 |
| YDR041W            | [P] RSM10 component of the mitochondrial ribosomal small subunit                     |
| YIL133C            | [P] RPL16A 60S large subunit ribosomal protein                                       |

|                    |                                                                                                     |
|--------------------|-----------------------------------------------------------------------------------------------------|
| YPL118W            | [P] MRP51 mitochondrial ribosomal protein of the small subunit                                      |
| YML026C            | [P] RPS18B ribosomal protein S18.e.c13                                                              |
| YNL306W            | [P] MRPS18 ribosomal protein of the small subunit, mitochondrial                                    |
| YNL301C            | [P] RPL18B 60S large subunit ribosomal protein L18.e                                                |
| YOL120C            | [P] RPL18A 60S large subunit ribosomal protein S18.e                                                |
| YPL183W-A          | [P] YPL183w-a strong similarity to mitochondrial and bacterial ribosomal L36 proteins               |
| YDR337W            | [P] MRPS28 ribosomal protein of the small subunit, mitochondrial                                    |
| YGR084C            | [P] MRP13 ribosomal protein of the small subunit, mitochondrial                                     |
| YDR450W            | [P] RPS18A ribosomal protein S18.e.c4                                                               |
| YNL137C            | [P] NAM9 ribosomal protein, mitochondrial                                                           |
| YHL004W            | [P] MRP4 ribosomal protein of the small subunit, mitochondrial                                      |
| YNL081C            | [P] YNL081c similarity to ribosomal protein S13                                                     |
| YJL191W            | [P] RPS14B 40S small subunit ribosomal protein S14.e.B                                              |
| YDR347W            | [P] MRP1 ribosomal protein of the small subunit, mitochondrial                                      |
| YDL083C            | [P] RPS16B ribosomal protein S16.e                                                                  |
| YMR143W            | [P] RPS16A ribosomal protein S16.e                                                                  |
| YNL069C            | [P] RPL16B 60S large subunit ribosomal protein                                                      |
| YBL038W            | [P] MRPL16 ribosomal protein of the large subunit, mitochondrial                                    |
| YLR075W            | [P] RPL10 60S large subunit ribosomal protein                                                       |
| YBR146W            | [P] MRPS9 ribosomal protein S9 precursor, mitochondrial                                             |
| YCR031C            | [P] RPS14A 40S Ribosomal protein S14.e                                                              |
| YOR150W            | [P] MRPL23 ribosomal protein of the large subunit, mitochondrial                                    |
| YMR260C            | [P] TIF11 translation initiation factor eIF1a                                                       |
| YIL021W            | [T] RPB3 DNA-directed RNA-polymerase II, 45 kDa                                                     |
| YBR154C            | [T] RPB5 DNA-directed RNA polymerase I, II, III 25 KD subunit                                       |
| YPR110C            | [T] RPC40 DNA-directed RNA polymerase I, III 40 KD subunit                                          |
| YPR187W            | [T] RPO26 DNA-directed RNA polymerase I, II, III 18 KD subunit                                      |
| YOR116C            | [T] RPO31 DNA-directed RNA polymerase III, 160 KD subunit                                           |
| YOR207C            | [T] RET1 DNA-directed RNA polymerase III, 130 KD subunit                                            |
| YOR341W            | [T] RPA190 DNA-directed RNA polymerase I, 190 KD alpha subunit                                      |
| YOR210W            | [T] RPB10 DNA-directed polymerase I, II, III 8.3 subunit                                            |
| YDL140C            | [T] RPO21 DNA-directed RNA polymerase II, 215 KD subunit                                            |
| YPR010C            | [T] RPA135 DNA-directed RNA polymerase I, 135 KD subunit                                            |
| YIL093C            | [U] RSM25 weak similarity to S.pombe hypothetical protein SPBC16A3                                  |
| YKL155C            | [U] RSM22 similarity to S. pombe SPAC1420.04c putative cytochrome c oxidase assembly protein        |
| YJR008W            | [U] YJR008w similarity to S.pombe hypothetical protein                                              |
| YGL129C            | [U] RSM23 similarity to S.pombe hypothetical protein SPBC29A3.15C - putative mitochondrial function |
| YDR036C            | [U] YDR036c similarity to enoyl CoA hydratase                                                       |
| <b>Q-clique 13</b> | <b>Function Annotation</b>                                                                          |
| YMR208W            | [M] ERG12 mevalonate kinase                                                                         |
| YJL063C            | [P] MRPL8 ribosomal protein L17, mitochondrial                                                      |
| YPL183W-A          | [P] YPL183w-a strong similarity to mitochondrial and bacterial ribosomal L36 proteins               |
| YMR260C            | [P] TIF11 translation initiation factor eIF1a                                                       |
| YBL038W            | [P] MRPL16 ribosomal protein of the large subunit, mitochondrial                                    |
| YLR075W            | [P] RPL10 60S large subunit ribosomal protein                                                       |
| YCR031C            | [P] RPS14A 40S Ribosomal protein S14.e                                                              |
| YDR450W            | [P] RPS18A ribosomal protein S18.e.c4                                                               |
| YNL081C            | [P] YNL081c similarity to ribosomal protein S13                                                     |
| YJR123W            | [P] RPS5 ribosomal protein S5.e                                                                     |
| YJL191W            | [P] RPS14B 40S small subunit ribosomal protein S14.e.B                                              |
| YML009C            | [P] MRPL39 60S ribosomal protein, mitochondrial                                                     |
| YML026C            | [P] RPS18B ribosomal protein S18.e.c13                                                              |
| YGL068W            | [P] YGL068w strong similarity to Cricetus mitochondrial ribosomal L12 protein                       |

|                    |                                                                                  |
|--------------------|----------------------------------------------------------------------------------|
| YOL120C            | [P] RPL18A 60S large subunit ribosomal protein S18.e                             |
| YNL301C            | [P] RPL18B 60S large subunit ribosomal protein L18.e                             |
| YNR003C            | [T] RPC34 DNA-directed RNA polymerase III, 34 KD subunit                         |
| YOR210W            | [T] RPB10 DNA-directed polymerase I, II, III 8.3 subunit                         |
| YPR190C            | [T] RPC82 DNA-directed RNA polymerase III, 82 KD subunit                         |
| YPR187W            | [T] RPO26 DNA-directed RNA polymerase I, II, III 18 KD subunit                   |
| YIL021W            | [T] RPB3 DNA-directed RNA-polymerase II, 45 kDa                                  |
| YPR110C            | [T] RPC40 DNA-directed RNA polymerase I, III 40 KD subunit                       |
| YOR341W            | [T] RPA190 DNA-directed RNA polymerase I, 190 KD alpha subunit                   |
| YDL140C            | [T] RPO21 DNA-directed RNA polymerase II, 215 KD subunit                         |
| YBR154C            | [T] RPB5 DNA-directed RNA polymerase I, II, III 25 KD subunit                    |
| YOR116C            | [T] RPO31 DNA-directed RNA polymerase III, 160 KD subunit                        |
| YOR151C            | [T] RPB2 DNA-directed RNA polymerase II, 140 kDa chain                           |
| YPR010C            | [T] RPA135 DNA-directed RNA polymerase I, 135 KD subunit                         |
| YOR207C            | [T] RET1 DNA-directed RNA polymerase III, 130 KD subunit                         |
| YOR224C            | [T] RPB8 DNA-directed RNA polymerase I, II, III 16 KD subunit                    |
| YML010W            | [T] SPT5 transcription elongation protein                                        |
| YJR008W            | [U] YJR008w similarity to S.pombe hypothetical protein                           |
| <b>Q-clique 14</b> | <b>Function Annotation</b>                                                       |
| YIL147C            | [C] SLN1 two-component signal transducer                                         |
| YMR262W            | [D] YMR262w similarity to S.pombe scn1 protein                                   |
| YGL205W            | [E] POX1 acyl-CoA oxidase                                                        |
| YAL054C            | [E] ACS1 acetyl-CoA synthetase                                                   |
| YER061C            | [E] CEM1 beta-keto-acyl-ACP synthase, mitochondrial                              |
| YLR153C            | [E] ACS2 acetyl-coenzyme A synthetase                                            |
| YIL160C            | [E] POT1 acetyl-CoA C-acyltransferase, peroxisomal                               |
| YHR208W            | [G] BAT1 branched chain amino acid aminotransferase, mitochondrial               |
| YIL042C            | [G] YIL042c similarity to rat branched-chain alpha-ketoacid dehydrogenase kinase |
| YJR148W            | [G] BAT2 branched chain amino acid aminotransferase, cytosolic                   |
| YBR222C            | [M] FAT2 AMP-binding protein, peroxisomal                                        |
| YBR208C            | [M] DUR1,2 urea amidolyase                                                       |
| YOR221C            | [M] MCT1 malonyl-CoA:ACP transferase                                             |
| YPL231W            | [M] FAS2 fatty-acyl-CoA synthase, alpha chain                                    |
| YPL028W            | [M] ERG10 acetyl-CoA C-acetyltransferase, cytosolic                              |
| YDR272W            | [M] GLO2 glyoxalase II (hydroxyacylglutathione hydrolase)                        |
| YLR284C            | [M] ECI1 delta3-cis-delta2-trans-enoyl-CoA isomerase                             |
| YJR057W            | [M] CDC8 dTMP kinase                                                             |
| YDL168W            | [M] SFA1 long-chain alcohol dehydrogenase                                        |
| YKL182W            | [M] FAS1 fatty-acyl-CoA synthase, beta chain                                     |
| YNR016C            | [M] ACC1 acetyl-CoA carboxylase                                                  |
| YKL192C            | [M] ACP1 mitochondrial acyl-carrier protein                                      |
| YOR180C            | [M] DCI1 Enoyl-CoA Hydratase, peroxisomal                                        |
| YBR041W            | [M] FAT1 very long-chain fatty acyl-CoA synthetase                               |
| YOR040W            | [M] GLO4 glyoxalase II (hydroxyacylglutathione hydrolase)                        |
| YKR009C            | [M] FOX2 hydratase-dehydrogenase-epimerase, peroxisomal                          |
| YCR003W            | [P] MRPL32 ribosomal protein YmL32, mitochondrial                                |
| YNL168C            | [U] YNL168c similarity to C.elegans ZK688.3 protein and E.coli hpcEp             |
| YGL059W            | [U] YGL059w similarity to rat branched-chain alpha-ketoacid dehydrogenase kinase |
| YGR263C            | [U] YGR263c weak similarity to E.coli lipase like enzyme                         |
| YDR036C            | [U] YDR036c similarity to enoyl CoA hydratase                                    |
| YDR428C            | [U] YDR428c weak similarity to predicted esterase of proteobacterium             |
| YOR093C            | [U] YOR093c similarity to S.pombe hypothetical protein SPAC22F3.04               |
| YBL055C            | [U] YBL055c similarity to hypothetical S.pombe protein                           |
| <b>Q-clique 15</b> | <b>Function Annotation</b>                                                       |
| YOL142W            | [D] RRP40 protein involved in ribosomal RNA processing, component of the exosome |

|                    |                                                                                           |
|--------------------|-------------------------------------------------------------------------------------------|
|                    | complex responsible for 3' end processing and degradation of many RNA species             |
| YNL232W            | [M] CSL4 core component of the 3'-5' exosome                                              |
| YOR076C            | [M] SKI7 GTPase with function in 3'-to-5' degradation of mRNA                             |
| YNL189W            | [O] SRP1 karyopherin-alpha or importin                                                    |
| YLR029C            | [P] RPL15A 60s large subunit ribosomal protein L15.e.c12                                  |
| YPR043W            | [P] RPL43A ribosomal protein L37a.e                                                       |
| YMR121C            | [P] RPL15B 60S large subunit ribosomal protein L15.e.c13                                  |
| YDL111C            | [T] RRP42 rRNA processing protein                                                         |
| YOL021C            | [T] DIS3 3'->5' exoribonuclease required for 3' end formation of 5.8S rRNA                |
| YCR035C            | [T] RRP43 rRNA processing protein                                                         |
| YHR062C            | [T] RPP1 required for processing of tRNA and 35S rRNA                                     |
| YGR195W            | [T] SKI6 3'->5' exoribonuclease required for 3' end formation of 5.8S rRNA                |
| YNL075W            | [T] IMP4 component of the U3 small nucleolar ribonucleoprotein                            |
| YAL033W            | [T] POP5 required for processing of tRNAs and rRNAs                                       |
| YGR158C            | [T] MTR3 involved in mRNA transport                                                       |
| YDR280W            | [T] RRP45 rRNA processing protein                                                         |
| YGR095C            | [T] RRP46 involved in rRNA processing                                                     |
| YHR069C            | [T] RRP4 3'->5' exoribonuclease required for 3' end formation of 5.8S rRNA                |
| YOR001W            | [U] RRP6 similarity to human nucleolar 100K polymyositis-scleroderma protein              |
| YLR022C            | [U] YLR022c similarity to C.elegans and M.jannaschii hypothetical proteins                |
| YHR088W            | [U] RPF1 similarity to hypothetical protein YNL075w                                       |
| <b>Q-clique 16</b> | <b>Function Annotation</b>                                                                |
| YIL147C            | [C] SLN1 two-component signal transducer                                                  |
| YMR262W            | [D] YMR262w similarity to S.pombe scn1 protein                                            |
| YLR153C            | [E] ACS2 acetyl-coenzyme A synthetase                                                     |
| YIL160C            | [E] POT1 acetyl-CoA C-acyltransferase, peroxisomal                                        |
| YGL205W            | [E] POX1 acyl-CoA oxidase                                                                 |
| YER061C            | [E] CEM1 beta-keto-acyl-ACP synthase, mitochondrial                                       |
| YIL042C            | [G] YIL042c similarity to rat branched-chain alpha-ketoacid dehydrogenase kinase          |
| YJR148W            | [G] BAT2 branched chain amino acid aminotransferase, cytosolic                            |
| YHR208W            | [G] BAT1 branched chain amino acid aminotransferase, mitochondrial                        |
| YOR180C            | [M] DCI1 Enoyl-CoA Hydratase, peroxisomal                                                 |
| YKR009C            | [M] FOX2 hydratase-dehydrogenase-epimerase, peroxisomal                                   |
| YBR222C            | [M] FAT2 AMP-binding protein, peroxisomal                                                 |
| YBR208C            | [M] DUR1,2 urea amidolyase                                                                |
| YOR221C            | [M] MCT1 malonyl-CoA:ACP transferase                                                      |
| YPL231W            | [M] FAS2 fatty-acyl-CoA synthase, alpha chain                                             |
| YPL028W            | [M] ERG10 acetyl-CoA C-acetyltransferase, cytosolic                                       |
| YJR057W            | [M] CDC8 dTMP kinase                                                                      |
| YDL168W            | [M] SFA1 long-chain alcohol dehydrogenase                                                 |
| YLR284C            | [M] ECI1 delta3-cis-delta2-trans-enoyl-CoA isomerase                                      |
| YKL182W            | [M] FAS1 fatty-acyl-CoA synthase, beta chain                                              |
| YNR016C            | [M] ACC1 acetyl-CoA carboxylase                                                           |
| YKL192C            | [M] ACP1 mitochondrial acyl-carrier protein                                               |
| YBR041W            | [M] FAT1 very long-chain fatty acyl-CoA synthetase                                        |
| YJR149W            | [M] YJR149w similarity to 2-nitropropane dioxygenase                                      |
| YCR003W            | [P] MRPL32 ribosomal protein YmL32, mitochondrial                                         |
| YGR263C            | [U] YGR263c weak similarity to E.coli lipase like enzyme                                  |
| YDR036C            | [U] YDR036c similarity to enoyl CoA hydratase                                             |
| YGL059W            | [U] YGL059w similarity to rat branched-chain alpha-ketoacid dehydrogenase kinase          |
| YDR428C            | [U] YDR428c weak similarity to predicted esterase of proteobacterium                      |
| YBL055C            | [U] YBL055c similarity to hypothetical S.pombe protein                                    |
| YOR093C            | [U] YOR093c similarity to S.pombe hypothetical protein SPAC22F3.04                        |
| <b>Q-clique 17</b> | <b>Function Annotation</b>                                                                |
| YGR245C            | [D] SDA1 required for normal organization of the actin cytoskeleton; required for passage |

|                    |                                                                                                                             |
|--------------------|-----------------------------------------------------------------------------------------------------------------------------|
|                    | through Start                                                                                                               |
| YER006W            | [O] YER006w similarity to P.polycephalum myosin-related protein mlpA                                                        |
| YOR206W            | [O] NOC2 crucial for intranuclear movement of ribosomal precursor particles                                                 |
| YPR016C            | [P] TIF6 translation initiation factor 6 (eIF6)                                                                             |
| YNL061W            | [T] NOP2 nucleolar protein                                                                                                  |
| YKL009W            | [T] MRT4 mRNA turnover 4                                                                                                    |
| YLL008W            | [T] DRS1 RNA helicase of the DEAD box family                                                                                |
| YDL051W            | [T] LHP1 RNA binding protein                                                                                                |
| YDL031W            | [T] DBP10 putative RNA helicase involved in ribosome biogenesis                                                             |
| YNL182C            | [U] YNL182c weak similarity to S.pombe hypothetical protein                                                                 |
| YLR106C            | [U] YLR106c similarity to Kaposi's sarcoma-associated herpes-like virus ORF73 homolog gene                                  |
| YHR052W            | [U] CIC1 adaptor protein specifically linking the 26S proteasome to its substrate, the SCF component CDC4                   |
| YPL093W            | [U] NOG1 similarity to M.jannaschii GTP-binding protein                                                                     |
| YGR090W            | [U] YGR090w similarity to PIR:T40678 hypothetical protein SPBC776.08c S. pombe                                              |
| YFR001W            | [U] LOC1 weak similarity to rabbit triadin SPP41P                                                                           |
| YNL002C            | [U] RLP7 strong similarity to mammalian ribosomal L7 proteins                                                               |
| YLR074C            | [U] BUD20 weak similarity to human zinc finger protein                                                                      |
| YGR103W            | [U] RRP13 similarity to zebrafish essential for embryonic development gene pescadillo                                       |
| YNL110C            | [U] YNL110c weak similarity to fruit fly RNA-binding protein                                                                |
| YGL111W            | [U] YGL111w weak similarity to hypothetical protein S. pombe                                                                |
| YOL077C            | [U] BRX1 strong similarity to C.elegans K12H4.3 protein                                                                     |
| YMR049C            | [U] ERB1 weak similarity to A.thaliana PRL1 protein                                                                         |
| YDR101C            | [U] YDR101c weak similarity to proliferation-associated protein                                                             |
| YDR496C            | [U] PUF6 similarity to hypothetical human and C.elegans proteins                                                            |
| YKR081C            | [U] YKR081c strong similarity to hypothetical protein S. pombe                                                              |
| YHR197W            | [U] YHR197w weak similarity to PIR:T22172 hypothetical protein F44E5.2 C. elegans                                           |
| YER126C            | [U] KRE32 weak similarity to E.coli colicin N                                                                               |
| <b>Q-clique 18</b> | <b>Function Annotation</b>                                                                                                  |
| YNL222W            | [B] SSU72 suppressor of cs mutant of SUA7                                                                                   |
| YER133W            | [C] GLC7 ser/thr phosphoprotein phosphatase 1, catalytic chain                                                              |
| YDR195W            | [T] REF2 RNA 3'-end formation protein                                                                                       |
| YMR061W            | [T] RNA14 component of pre-mRNA 3'-end processing factor CF I                                                               |
| YDR301W            | [T] CFT1 pre-mRNA 3'-end processing factor CF II                                                                            |
| YAL043C            | [T] PTA1 pre-tRNA processing protein / PF I subunit                                                                         |
| YKR002W            | [T] PAP1 poly(A) polymerase                                                                                                 |
| YJR093C            | [T] FIP1 component of pre-mRNA polyadenylation factor PF I                                                                  |
| YDR228C            | [T] PCF11 component of pre-mRNA 3'-end processing factor CF I                                                               |
| YNL317W            | [T] PFS2 polyadenylation factor I subunit 2 required for mRNA 3'-end processing, bridges two mRNA 3'-end processing factors |
| YLR115W            | [T] CFT2 cleavage and polyadenylation specificity factor, part of CF II                                                     |
| YPR107C            | [T] YTH1 protein of the 3' processing complex                                                                               |
| YLR277C            | [T] YSH1 component of pre-mRNA polyadenylation factor PF I                                                                  |
| YGR156W            | [U] PTI1 weak similarity to PIR:A40220 cleavage stimulation factor 64K chain - human                                        |
| YKL059C            | [U] YKL059c similarity to C.elegans hypothetical protein                                                                    |
| YKL018W            | [U] SWD2 similarity to C.elegans hypothetical protein                                                                       |
| <b>Q-clique 19</b> | <b>Function Annotation</b>                                                                                                  |
| YML054C            | [E] CYB2 lactate dehydrogenase cytochrome b2                                                                                |
| YMR208W            | [M] ERG12 mevalonate kinase                                                                                                 |
| YLR048W            | [P] RPS0B 40S ribosomal protein p40 homolog B                                                                               |
| YPL118W            | [P] MRP51 mitochondrial ribosomal protein of the small subunit                                                              |
| YDR337W            | [P] MRPS28 ribosomal protein of the small subunit, mitochondrial                                                            |
| YBR146W            | [P] MRPS9 ribosomal protein S9 precursor, mitochondrial                                                                     |
| YNL137C            | [P] NAM9 ribosomal protein, mitochondrial                                                                                   |

|                    |                                                                                                     |
|--------------------|-----------------------------------------------------------------------------------------------------|
| YGR214W            | [P] RPS0A 40S ribosomal protein p40 homolog A                                                       |
| YDR347W            | [P] MRP1 ribosomal protein of the small subunit, mitochondrial                                      |
| YNL306W            | [P] MRPS18 ribosomal protein of the small subunit, mitochondrial                                    |
| YOL120C            | [P] RPL18A 60S large subunit ribosomal protein S18.e                                                |
| YNL301C            | [P] RPL18B 60S large subunit ribosomal protein L18.e                                                |
| YGR084C            | [P] MRP13 ribosomal protein of the small subunit, mitochondrial                                     |
| YHL004W            | [P] MRP4 ribosomal protein of the small subunit, mitochondrial                                      |
| YPR187W            | [T] RPO26 DNA-directed RNA polymerase I, II, III 18 KD subunit                                      |
| YOR210W            | [T] RPB10 DNA-directed polymerase I, II, III 8.3 subunit                                            |
| YIL093C            | [U] RSM25 weak similarity to S.pombe hypothetical protein SPBC16A3                                  |
| YKL155C            | [U] RSM22 similarity to S. pombe SPAC1420.04c putative cytochrome c oxidase assembly protein        |
| YJR008W            | [U] YJR008w similarity to S.pombe hypothetical protein                                              |
| YGL129C            | [U] RSM23 similarity to S.pombe hypothetical protein SPBC29A3.15C - putative mitochondrial function |
| YDR036C            | [U] YDR036c similarity to enoyl CoA hydratase                                                       |
| <b>Q-clique 20</b> | <b>Function Annotation</b>                                                                          |
| YLR244C            | [F] MAP1 methionine aminopeptidase, isoform 1                                                       |
| YBL091C            | [F] MAP2 methionine aminopeptidase, isoform 2                                                       |
| YDR226W            | [M] ADK1 adenylate kinase, cytosolic                                                                |
| YJL063C            | [P] MRPL8 ribosomal protein L17, mitochondrial                                                      |
| YGR118W            | [P] RPS23A 40S small subunit ribosomal protein S23.e                                                |
| YGL135W            | [P] RPL1B 60S large subunit ribosomal protein                                                       |
| YEL054C            | [P] RPL12A 60S large subunit ribosomal protein L12.e                                                |
| YOR335C            | [P] ALA1 alanyl-tRNA synthetase, cytosolic                                                          |
| YDL202W            | [P] MRPL11 ribosomal protein of the large subunit, mitochondrial                                    |
| YGL068W            | [P] YGL068w strong similarity to Cricetus mitochondrial ribosomal L12 protein                       |
| YPL220W            | [P] RPL1A ribosomal protein                                                                         |
| YPR132W            | [P] RPS23B 40S small subunit ribosomal protein S23.e                                                |
| YPL183W-A          | [P] YPL183w-a strong similarity to mitochondrial and bacterial ribosomal L36 proteins               |
| YGL030W            | [P] RPL30 60S large subunit ribosomal protein L30.e                                                 |
| YDR418W            | [P] RPL12B 60S large subunit ribosomal protein L12.e                                                |
| YHL015W            | [P] RPS20 ribosomal protein                                                                         |
| YLR340W            | [P] RPP0 acidic ribosomal protein L10.e                                                             |
| YBL038W            | [P] MRPL16 ribosomal protein of the large subunit, mitochondrial                                    |
| YLR075W            | [P] RPL10 60S large subunit ribosomal protein                                                       |
| YNL185C            | [P] MRPL19 ribosomal protein of the large subunit, mitochondrial                                    |
| YJR123W            | [P] RPS5 ribosomal protein S5.e                                                                     |
| YML009C            | [P] MRPL39 60S ribosomal protein, mitochondrial                                                     |
| YMR260C            | [P] TIF11 translation initiation factor eIF1a                                                       |
| YNR036C            | [P] YNR036c strong similarity to ribosomal protein S12                                              |
| YDR116C            | [P] YDR116c similarity to bacterial ribosomal L1 proteins                                           |
| YML010W            | [T] SPT5 transcription elongation protein                                                           |
| YBR154C            | [T] RPB5 DNA-directed RNA polymerase I, II, III 25 KD subunit                                       |
| YOR151C            | [T] RPB2 DNA-directed RNA polymerase II, 140 kDa chain                                              |
| YOR341W            | [T] RPA190 DNA-directed RNA polymerase I, 190 KD alpha subunit                                      |
| YPR010C            | [T] RPA135 DNA-directed RNA polymerase I, 135 KD subunit                                            |
| YDL140C            | [T] RPO21 DNA-directed RNA polymerase II, 215 KD subunit                                            |
| YKL009W            | [T] MRT4 mRNA turnover 4                                                                            |
| YOR207C            | [T] RET1 DNA-directed RNA polymerase III, 130 KD subunit                                            |
| YOR116C            | [T] RPO31 DNA-directed RNA polymerase III, 160 KD subunit                                           |
| YDR101C            | [U] YDR101c weak similarity to proliferation-associated protein                                     |
| <b>Q-clique 21</b> | <b>Function Annotation</b>                                                                          |
| YLR153C            | [E] ACS2 acetyl-coenzyme A synthetase                                                               |
| YER061C            | [E] CEM1 beta-keto-acyl-ACP synthase, mitochondrial                                                 |



|                    |                                                                                                     |
|--------------------|-----------------------------------------------------------------------------------------------------|
| YAL054C            | [E] ACS1 acetyl-CoA synthetase                                                                      |
| YKL182W            | [M] FAS1 fatty-acyl-CoA synthase, beta chain                                                        |
| YKL192C            | [M] ACP1 mitochondrial acyl-carrier protein                                                         |
| YPL231W            | [M] FAS2 fatty-acyl-CoA synthase, alpha chain                                                       |
| YBR041W            | [M] FAT1 very long-chain fatty acyl-CoA synthetase                                                  |
| YBR222C            | [M] FAT2 AMP-binding protein, peroxisomal                                                           |
| YKR009C            | [M] FOX2 hydratase-dehydrogenase-epimerase, peroxisomal                                             |
| YNR016C            | [M] ACC1 acetyl-CoA carboxylase                                                                     |
| YBR208C            | [M] DUR1,2 urea amidolyase                                                                          |
| YNL137C            | [P] NAM9 ribosomal protein, mitochondrial                                                           |
| YDR041W            | [P] RSM10 component of the mitochondrial ribosomal small subunit                                    |
| YNL306W            | [P] MRPS18 ribosomal protein of the small subunit, mitochondrial                                    |
| YDR347W            | [P] MRP1 ribosomal protein of the small subunit, mitochondrial                                      |
| YGR084C            | [P] MRP13 ribosomal protein of the small subunit, mitochondrial                                     |
| YPL118W            | [P] MRP51 mitochondrial ribosomal protein of the small subunit                                      |
| YJR113C            | [P] RSM7 similarity to bacterial, chloroplast and mitochondrial ribosomal protein S7                |
| YDR337W            | [P] MRPS28 ribosomal protein of the small subunit, mitochondrial                                    |
| YIL093C            | [U] RSM25 weak similarity to S.pombe hypothetical protein SPBC16A3                                  |
| YOR093C            | [U] YOR093c similarity to S.pombe hypothetical protein SPAC22F3.04                                  |
| YKL155C            | [U] RSM22 similarity to S. pombe SPAC1420.04c putative cytochrome c oxidase assembly protein        |
| YDR036C            | [U] YDR036c similarity to enoyl CoA hydratase                                                       |
| YGL129C            | [U] RSM23 similarity to S.pombe hypothetical protein SPBC29A3.15C - putative mitochondrial function |
| <b>Q-clique 22</b> | <b>Function Annotation</b>                                                                          |
| YLR006C            | [A] SSK1 two-component signal transducer                                                            |
| YDL235C            | [A] YPD1 phosphorelay intermediate between SLN1P and SSK1P                                          |
| YHR206W            | [B] SKN7 transcription factor with similarity to HSF1P                                              |
| YIL147C            | [C] SLN1 two-component signal transducer                                                            |
| YFL033C            | [C] RIM15 protein kinase involved in expression of meiotic genes                                    |
| YDR076W            | [D] RAD55 DNA repair protein                                                                        |
| Q0250              | [E] COX2 cytochrome-c oxidase subunit II                                                            |
| Q0275              | [E] COX3 cytochrome-c oxidase chain III                                                             |
| Q0045              | [E] COX1 cytochrome-c oxidase subunit I                                                             |
| YGR112W            | [E] SHY1 SURF homologue protein                                                                     |
| YDR292C            | [F] SRP101 signal recognition particle receptor, alpha chain                                        |
| YDR127W            | [G] ARO1 arom pentafunctional enzyme                                                                |
| YIL042C            | [G] YIL042c similarity to rat branched-chain alpha-ketoacid dehydrogenase kinase                    |
| YKL104C            | [M] GFA1 glucosamine--fructose-6-phosphate transaminase                                             |
| YNL123W            | [U] YNL123w weak similarity to C.jejuni serine protease                                             |
| YGL059W            | [U] YGL059w similarity to rat branched-chain alpha-ketoacid dehydrogenase kinase                    |
| <b>Q-clique 23</b> | <b>Function Annotation</b>                                                                          |
| YNL306W            | [P] MRPS18 ribosomal protein of the small subunit, mitochondrial                                    |
| YJR113C            | [P] RSM7 similarity to bacterial, chloroplast and mitochondrial ribosomal protein S7                |
| YDR347W            | [P] MRP1 ribosomal protein of the small subunit, mitochondrial                                      |
| YGR084C            | [P] MRP13 ribosomal protein of the small subunit, mitochondrial                                     |
| YDR041W            | [P] RSM10 component of the mitochondrial ribosomal small subunit                                    |
| YBR146W            | [P] MRPS9 ribosomal protein S9 precursor, mitochondrial                                             |
| YPL118W            | [P] MRP51 mitochondrial ribosomal protein of the small subunit                                      |
| YDR337W            | [P] MRPS28 ribosomal protein of the small subunit, mitochondrial                                    |
| YNL137C            | [P] NAM9 ribosomal protein, mitochondrial                                                           |
| YGL129C            | [U] RSM23 similarity to S.pombe hypothetical protein SPBC29A3.15C - putative mitochondrial function |
| YIL093C            | [U] RSM25 weak similarity to S.pombe hypothetical protein SPBC16A3                                  |
| YDR036C            | [U] YDR036c similarity to enoyl CoA hydratase                                                       |

|                    |                                                                                                     |
|--------------------|-----------------------------------------------------------------------------------------------------|
| YKL155C            | [U] RSM22 similarity to <i>S. pombe</i> SPAC1420.04c putative cytochrome c oxidase assembly protein |
| <b>Q-clique 24</b> | <b>Function Annotation</b>                                                                          |
| YMR208W            | [M] ERG12 mevalonate kinase                                                                         |
| YDL083C            | [P] RPS16B ribosomal protein S16.e                                                                  |
| YMR143W            | [P] RPS16A ribosomal protein S16.e                                                                  |
| YLR048W            | [P] RPS0B 40S ribosomal protein p40 homolog B                                                       |
| YOR150W            | [P] MRPL23 ribosomal protein of the large subunit, mitochondrial                                    |
| YNL069C            | [P] RPL16B 60S large subunit ribosomal protein                                                      |
| YNL301C            | [P] RPL18B 60S large subunit ribosomal protein L18.e                                                |
| YOL120C            | [P] RPL18A 60S large subunit ribosomal protein S18.e                                                |
| YIL133C            | [P] RPL16A 60S large subunit ribosomal protein                                                      |
| YGR214W            | [P] RPS0A 40S ribosomal protein p40 homolog A                                                       |
| YKL144C            | [T] RPC25 DNA-directed RNA polymerase III, 25 KD subunit                                            |
| YPR190C            | [T] RPC82 DNA-directed RNA polymerase III, 82 KD subunit                                            |
| YPR187W            | [T] RPO26 DNA-directed RNA polymerase I, II, III 18 KD subunit                                      |
| YDL150W            | [T] RPC53 DNA-directed RNA polymerase III, 47 KD subunit                                            |
| YPR010C            | [T] RPA135 DNA-directed RNA polymerase I, 135 KD subunit                                            |
| YNL113W            | [T] RPC19 DNA-directed RNA polymerase I,III 16 KD subunit                                           |
| YNL248C            | [T] RPA49 DNA-directed RNA polymerase A (I) chain, 46 kDa                                           |
| YKR025W            | [T] RPC37 Pol III transcription                                                                     |
| YPR110C            | [T] RPC40 DNA-directed RNA polymerase I, III 40 KD subunit                                          |
| YBR154C            | [T] RPB5 DNA-directed RNA polymerase I, II, III 25 KD subunit                                       |
| YNL151C            | [T] RPC31 DNA-directed RNA polymerase III, 31 KD subunit                                            |
| YNR003C            | [T] RPC34 DNA-directed RNA polymerase III, 34 KD subunit                                            |
| YOR116C            | [T] RPO31 DNA-directed RNA polymerase III, 160 KD subunit                                           |
| YOR207C            | [T] RET1 DNA-directed RNA polymerase III, 130 KD subunit                                            |
| YOR224C            | [T] RPB8 DNA-directed RNA polymerase I, II, III 16 KD subunit                                       |
| YOR210W            | [T] RPB10 DNA-directed polymerase I, II, III 8.3 subunit                                            |
| YJR008W            | [U] YJR008w similarity to <i>S.pombe</i> hypothetical protein                                       |
| <b>Q-clique 25</b> | <b>Function Annotation</b>                                                                          |
| YLR006C            | [A] SSK1 two-component signal transducer                                                            |
| YHR206W            | [B] SKN7 transcription factor with similarity to HSF1P                                              |
| YIL147C            | [C] SLN1 two-component signal transducer                                                            |
| YFL033C            | [C] RIM15 protein kinase involved in expression of meiotic genes                                    |
| YML054C            | [E] CYB2 lactate dehydrogenase cytochrome b2                                                        |
| YGR112W            | [E] SHY1 SURF homologue protein                                                                     |
| Q0275              | [E] COX3 cytochrome-c oxidase chain III                                                             |
| Q0045              | [E] COX1 cytochrome-c oxidase subunit I                                                             |
| Q0250              | [E] COX2 cytochrome-c oxidase subunit II                                                            |
| YDR292C            | [F] SRP101 signal recognition particle receptor, alpha chain                                        |
| YIL042C            | [G] YIL042c similarity to rat branched-chain alpha-ketoacid dehydrogenase kinase                    |
| YER069W            | [G] ARG5,6 acetylglutamate kinase and acetylglutamyl-phosphate reductase                            |
| YDR127W            | [G] ARO1 arom pentafunctional enzyme                                                                |
| YGL059W            | [U] YGL059w similarity to rat branched-chain alpha-ketoacid dehydrogenase kinase                    |
| <b>Q-clique 26</b> | <b>Function Annotation</b>                                                                          |
| YLR447C            | [A] VMA6 H <sup>+</sup> -ATPase V0 domain 36 KD subunit, vacuolar                                   |
| YGR020C            | [A] VMA7 H <sup>+</sup> -ATPase V1 domain 14 kDa subunit, vacuolar                                  |
| YHR026W            | [A] PPA1 H <sup>+</sup> -ATPase 23 KD subunit, vacuolar                                             |
| YMR054W            | [A] STV1 H <sup>+</sup> -ATPase V0 domain 102 KD subunit, not vacuolar                              |
| YEL051W            | [A] VMA8 H <sup>+</sup> -ATP synthase V1 domain 32 KD subunit, vacuolar                             |
| YDL227C            | [C] HO homothallic switching endonuclease                                                           |
| Q0130              | [E] OLI1 F1F0-ATPase complex, F0 subunit 9                                                          |
| YBR127C            | [O] VMA2 H <sup>+</sup> -ATPase V1 domain 60 KD subunit, vacuolar                                   |
| YEL027W            | [O] CUP5 H <sup>+</sup> -ATPase V0 domain 17 KD subunit, vacuolar                                   |

|                    |                                                                                                    |
|--------------------|----------------------------------------------------------------------------------------------------|
| YOR332W            | [O] VMA4 H <sup>+</sup> -ATPase V1 domain 27 KD subunit, vacuolar                                  |
| YPL234C            | [O] TFP3 H <sup>+</sup> -ATPase V0 domain 17 KD subunit, vacuolar                                  |
| YOR270C            | [O] VPH1 H <sup>+</sup> -ATPase V0 domain 95K subunit, vacuolar                                    |
| YDL185W            | [O] TFP1 H <sup>+</sup> -ATPase V1 domain 69 KD catalytic subunit, vacuolar                        |
| YPR010C            | [T] RPA135 DNA-directed RNA polymerase I, 135 KD subunit                                           |
| YDL150W            | [T] RPC53 DNA-directed RNA polymerase III, 47 KD subunit                                           |
| YNL113W            | [T] RPC19 DNA-directed RNA polymerase I,III 16 KD subunit                                          |
| YKR025W            | [T] RPC37 Pol III transcription                                                                    |
| YBR154C            | [T] RPB5 DNA-directed RNA polymerase I, II, III 25 KD subunit                                      |
| YNL248C            | [T] RPA49 DNA-directed RNA polymerase A (I) chain, 46 kDa                                          |
| YNR003C            | [T] RPC34 DNA-directed RNA polymerase III, 34 KD subunit                                           |
| YOR341W            | [T] RPA190 DNA-directed RNA polymerase I, 190 KD alpha subunit                                     |
| YNL151C            | [T] RPC31 DNA-directed RNA polymerase III, 31 KD subunit                                           |
| YOR116C            | [T] RPO31 DNA-directed RNA polymerase III, 160 KD subunit                                          |
| YOR207C            | [T] RET1 DNA-directed RNA polymerase III, 130 KD subunit                                           |
| YKL144C            | [T] RPC25 DNA-directed RNA polymerase III, 25 KD subunit                                           |
| YOR224C            | [T] RPB8 DNA-directed RNA polymerase I, II, III 16 KD subunit                                      |
| YPR187W            | [T] RPO26 DNA-directed RNA polymerase I, II, III 18 KD subunit                                     |
| YPR190C            | [T] RPC82 DNA-directed RNA polymerase III, 82 KD subunit                                           |
| <b>Q-clique 27</b> | <b>Function Annotation</b>                                                                         |
| YNL189W            | [O] SRP1 karyopherin-alpha or importin                                                             |
| YDR432W            | [O] NPL3 nucleolar protein                                                                         |
| YLR347C            | [O] KAP95 karyopherin-beta                                                                         |
| YGR162W            | [P] TIF4631 mRNA cap-binding protein (eIF4F), 150K subunit                                         |
| YGL049C            | [P] TIF4632 mRNA cap-binding protein (eIF4F), 130K subunit                                         |
| YLR298C            | [T] YHC1 associated with the U1 snRNP complex                                                      |
| YGR074W            | [T] SMD1 snRNA-associated protein                                                                  |
| YML046W            | [T] PRP39 pre-mRNA splicing factor                                                                 |
| YKL012W            | [T] PRP40 splicing factor                                                                          |
| YPL178W            | [T] CBC2 small subunit of the nuclear cap-binding protein complex CBC                              |
| YDL087C            | [T] LUC7 yeast U1 snRNP protein with a role in 5' splice site recognition                          |
| YLR275W            | [T] SMD2 U1 snRNP protein of the Sm class                                                          |
| YLR147C            | [T] SMD3 spliceosomal snRNA-associated Sm core protein required for pre-mRNA splicing              |
| YGR013W            | [T] SNU71 associated with U1 snRNP, no counterpart in mammalian U1 snRNP                           |
| YDR235W            | [T] PRP42 U1 snRNP associated protein, required for pre-mRNA splicing                              |
| YER029C            | [T] SMB1 associated with U1 snRNP as part of the Sm-core that is common to all spliceosomal snRNPs |
| YHR086W            | [T] NAM8 meiotic recombination protein                                                             |
| YMR125W            | [T] STO1 large subunit of the nuclear cap-binding protein complex CBC                              |
| YIL061C            | [T] SNP1 U1 small nuclear ribonucleoprotein                                                        |
| YDR240C            | [T] SNU56 U1 snRNA protein, no counterpart in mammalian snRNP                                      |
| YBR119W            | [T] MUD1 U1 snRNP-specific A protein                                                               |
| <b>Q-clique 28</b> | <b>Function Annotation</b>                                                                         |
| YLR117C            | [D] CLF1 strong similarity to Drosophila putative cell cycle control protein crn                   |
| YDR364C            | [D] CDC40 cell division control protein                                                            |
| YMR213W            | [D] CEF1 required during G2/M transition                                                           |
| YML049C            | [O] RSE1 involved in RNA splicing and ER to Golgi transport                                        |
| YKL173W            | [P] SNU114 U5 snRNP-specific protein                                                               |
| YGL128C            | [R] YGL128c weak similarity to dnaJ proteins                                                       |
| YDL030W            | [T] PRP9 pre-mRNA splicing factor (snRNA-associated protein)                                       |
| YPR101W            | [T] SNT309 splicing factor                                                                         |
| YGR091W            | [T] PRP31 pre-mRNA splicing protein                                                                |
| YPR178W            | [T] PRP4 U4/U6 snRNP 52 KD protein                                                                 |
| YLL036C            | [T] PRP19 non-snRNP spliceosome component required for DNA repair                                  |

|                    |                                                                                       |
|--------------------|---------------------------------------------------------------------------------------|
| YJL203W            | [T] PRP21 pre-mRNA splicing factor                                                    |
| YMR240C            | [T] CUS1 U2 snRNP protein                                                             |
| YBR055C            | [T] PRP6 snRNP(U4/U6)-associated splicing factor                                      |
| YPL213W            | [T] LEA1 U2 A' snRNP protein                                                          |
| YDR416W            | [T] SYF1 synthetic lethal with CDC40                                                  |
| YMR288W            | [T] HSH155 component of a multiprotein splicing factor                                |
| YGL120C            | [T] PRP43 involved in spliceosome disassembly                                         |
| YAL032C            | [T] PRP45 pre-mRNA splicing factor                                                    |
| YGR278W            | [U] YGR278w similarity to C.elegans LET-858                                           |
| YLR424W            | [U] YLR424w weak similarity to STUIP                                                  |
| YPL151C            | [U] PRP46 strong similarity to A.thaliana PRL1 and PRL2 proteins                      |
| YDL209C            | [U] YDL209c similarity to hypothetical S. pombe protein                               |
| <b>Q-clique 29</b> | <b>Function Annotation</b>                                                            |
| YJR113C            | [P] RSM7 similarity to bacterial, chloroplast and mitochondrial ribosomal protein S7  |
| YGL030W            | [P] RPL30 60S large subunit ribosomal protein L30.e                                   |
| YNL113W            | [T] RPC19 DNA-directed RNA polymerase I,III 16 KD subunit                             |
| YKR025W            | [T] RPC37 Pol III transcription                                                       |
| YBR154C            | [T] RPB5 DNA-directed RNA polymerase I, II, III 25 KD subunit                         |
| YJR063W            | [T] RPA12 DNA-directed RNA polymerase I, 13.7 KD subunit                              |
| YOR341W            | [T] RPA190 DNA-directed RNA polymerase I, 190 KD alpha subunit                        |
| YNL248C            | [T] RPA49 DNA-directed RNA polymerase A (I) chain, 46 kDa                             |
| YNR003C            | [T] RPC34 DNA-directed RNA polymerase III, 34 KD subunit                              |
| YNL151C            | [T] RPC31 DNA-directed RNA polymerase III, 31 KD subunit                              |
| YKL144C            | [T] RPC25 DNA-directed RNA polymerase III, 25 KD subunit                              |
| YOR116C            | [T] RPO31 DNA-directed RNA polymerase III, 160 KD subunit                             |
| YPR190C            | [T] RPC82 DNA-directed RNA polymerase III, 82 KD subunit                              |
| YOR207C            | [T] RET1 DNA-directed RNA polymerase III, 130 KD subunit                              |
| YOR224C            | [T] RPB8 DNA-directed RNA polymerase I, II, III 16 KD subunit                         |
| YDL150W            | [T] RPC53 DNA-directed RNA polymerase III, 47 KD subunit                              |
| YPR010C            | [T] RPA135 DNA-directed RNA polymerase I, 135 KD subunit                              |
| <b>Q-clique 30</b> | <b>Function Annotation</b>                                                            |
| YEL051W            | [A] VMA8 H+-ATPsynthase V1 domain 32 KD subunit, vacuolar                             |
| YHR026W            | [A] PPA1 H+-ATPase 23 KD subunit, vacuolar                                            |
| YGR020C            | [A] VMA7 H+-ATPase V1 domain 14 kDa subunit, vacuolar                                 |
| YLR447C            | [A] VMA6 H+-ATPase V0 domain 36 KD subunit, vacuolar                                  |
| Q0130              | [E] OLI1 F1F0-ATPase complex, F0 subunit 9                                            |
| YJR121W            | [E] ATP2 F1F0-ATPase complex, F1 beta subunit                                         |
| Q0085              | [E] ATP6 F1F0-ATPase complex, FO A subunit                                            |
| YDR298C            | [E] ATP5 F1F0-ATPase complex, OSCP subunit                                            |
| YBL099W            | [E] ATP1 F1F0-ATPase complex, F1 alpha subunit                                        |
| YDL004W            | [E] ATP16 F1F0-ATPase complex, F1 delta subunit                                       |
| YBR039W            | [E] ATP3 F1F0-ATPase complex, F1 gamma subunit                                        |
| YBR127C            | [O] VMA2 H+-ATPase V1 domain 60 KD subunit, vacuolar                                  |
| YEL027W            | [O] CUP5 H+-ATPase V0 domain 17 KD subunit, vacuolar                                  |
| YOR332W            | [O] VMA4 H+-ATPase V1 domain 27 KD subunit, vacuolar                                  |
| YPL234C            | [O] TFP3 H+-ATPase V0 domain 17 KD subunit, vacuolar                                  |
| YDL185W            | [O] TFP1 H+-ATPase V1 domain 69 KD catalytic subunit, vacuolar                        |
| YGL236C            | [P] MTO1 strong similarity to gidA E.coli protein                                     |
| YLR289W            | [P] GUF1 strong similarity to E. coli elongation factor-type GTP-binding protein lepa |
| <b>Q-clique 31</b> | <b>Function Annotation</b>                                                            |
| YMR118C            | [E] YMR118c strong similarity to succinate dehydrogenase                              |
| YLL041C            | [E] SDH2 succinate dehydrogenase iron-sulfur protein subunit                          |
| YDR148C            | [E] KGD2 2-oxoglutarate dehydrogenase complex E2 component                            |
| YOR142W            | [E] LSC1 succinate-CoA ligase alpha subunit                                           |
| YER178W            | [E] PDA1 pyruvate dehydrogenase (lipoamide) alpha chain precursor                     |

|                    |                                                                                              |
|--------------------|----------------------------------------------------------------------------------------------|
| YBR221C            | [E] PDB1 pyruvate dehydrogenase (lipoamide) beta chain precursor                             |
| YIL125W            | [E] KGD1 2-oxoglutarate dehydrogenase complex E1 component                                   |
| YNL071W            | [E] LAT1 dihydrolipoamide S-acetyltransferase                                                |
| YGR244C            | [E] LSC2 succinate-CoA ligase beta subunit                                                   |
| YKL141W            | [E] SDH3 cytochrome b560 subunit of respiratory complex II                                   |
| YGR193C            | [E] PDX1 pyruvate dehydrogenase complex protein X                                            |
| YOR375C            | [G] GDH1 glutamate dehydrogenase (NADP+)                                                     |
| YFL018C            | [G] LPD1 dihydrolipoamide dehydrogenase precursor                                            |
| YAL062W            | [G] GDH3 NADP-glutamate dehydrogenase                                                        |
| YML022W            | [M] APT1 adenine phosphoribosyltransferase                                                   |
| YOR196C            | [M] LIP5 lipoic acid synthase                                                                |
| YDR441C            | [M] APT2 adenine phosphoribosyltransferase                                                   |
| YPL017C            | [M] YPL017c strong similarity to LPD1P and other dihydrolipoamide dehydrogenases             |
| YJL046W            | [U] YJL046w similarity to E.coli lipoate-protein ligase A                                    |
| <b>Q-clique 30</b> | <b>Function Annotation</b>                                                                   |
| YMR262W            | [D] YMR262w similarity to S.pombe scn1 protein                                               |
| YER061C            | [E] CEM1 beta-keto-acyl-ACP synthase, mitochondrial                                          |
| YPL148C            | [F] PPT2 phosphopantetheine protein transferase                                              |
| YHR208W            | [G] BAT1 branched chain amino acid aminotransferase, mitochondrial                           |
| YJR148W            | [G] BAT2 branched chain amino acid aminotransferase, cytosolic                               |
| YKL192C            | [M] ACP1 mitochondrial acyl-carrier protein                                                  |
| YPL231W            | [M] FAS2 fatty-acyl-CoA synthase, alpha chain                                                |
| YOR221C            | [M] MCT1 malonyl-CoA:ACP transferase                                                         |
| YJR057W            | [M] CDC8 dTMP kinase                                                                         |
| YKL182W            | [M] FAS1 fatty-acyl-CoA synthase, beta chain                                                 |
| YDR454C            | [M] GUK1 guanylate kinase                                                                    |
| YMR024W            | [P] MRPL3 ribosomal protein of the large subunit, mitochondrial                              |
| YCR003W            | [P] MRPL32 ribosomal protein YmL32, mitochondrial                                            |
| YMR239C            | [T] RNT1 double-stranded ribonuclease                                                        |
| YBL055C            | [U] YBL055c similarity to hypothetical S.pombe protein                                       |
| <b>Q-clique 33</b> | <b>Function Annotation</b>                                                                   |
| YCL017C            | [A] NFS1 regulates Iron-Sulfur cluster proteins, cellular Iron uptake, and Iron distribution |
| YPR067W            | [A] ISA2 mitochondrial protein required for iron metabolism                                  |
| YLL027W            | [A] ISA1 mitochondrial protein required for normal iron metabolism                           |
| YGL018C            | [F] JAC1 molecular chaperone                                                                 |
| YPL135W            | [M] ISU1 strong similarity to nitrogen fixation protein (nifU)                               |
| YOR226C            | [M] ISU2 strong similarity to nitrogen fixation proteins                                     |
| YLR231C            | [M] YLR231c strong similarity to rat kynureninase                                            |
| YKL067W            | [M] YNK1 nucleoside diphosphate kinase                                                       |
| YDR283C            | [P] GCN2 ser/thr protein kinase                                                              |
| YPR033C            | [P] HTS1 histidine--tRNA ligase, mitochondrial                                               |
| YPL252C            | [U] YAH1 similarity to adrenodoxin and ferredoxin                                            |
| <b>Q-clique 34</b> | <b>Function Annotation</b>                                                                   |
| YLL027W            | [A] ISA1 mitochondrial protein required for normal iron metabolism                           |
| YCL017C            | [A] NFS1 regulates Iron-Sulfur cluster proteins, cellular Iron uptake, and Iron distribution |
| YPR067W            | [A] ISA2 mitochondrial protein required for iron metabolism                                  |
| YGL018C            | [F] JAC1 molecular chaperone                                                                 |
| YLR231C            | [M] YLR231c strong similarity to rat kynureninase                                            |
| YPL135W            | [M] ISU1 strong similarity to nitrogen fixation protein (nifU)                               |
| YKL040C            | [M] NFU1 iron homeostasis                                                                    |
| YOR226C            | [M] ISU2 strong similarity to nitrogen fixation proteins                                     |
| YKL067W            | [M] YNK1 nucleoside diphosphate kinase                                                       |
| YPR033C            | [P] HTS1 histidine--tRNA ligase, mitochondrial                                               |
| YDR283C            | [P] GCN2 ser/thr protein kinase                                                              |
| YPL252C            | [U] YAH1 similarity to adrenodoxin and ferredoxin                                            |

| <b>Q-clique 35</b> | <b>Function Annotation</b>                                                                   |
|--------------------|----------------------------------------------------------------------------------------------|
| YMR118C            | [E] YMR118c strong similarity to succinate dehydrogenase                                     |
| YLL041C            | [E] SDH2 succinate dehydrogenase iron-sulfur protein subunit                                 |
| YDR148C            | [E] KGD2 2-oxoglutarate dehydrogenase complex E2 component                                   |
| YOR142W            | [E] LSC1 succinate-CoA ligase alpha subunit                                                  |
| YER178W            | [E] PDA1 pyruvate dehydrogenase (lipoamide) alpha chain precursor                            |
| YBR221C            | [E] PDB1 pyruvate dehydrogenase (lipoamide) beta chain precursor                             |
| YIL125W            | [E] KGD1 2-oxoglutarate dehydrogenase complex E1 component                                   |
| YNL071W            | [E] LAT1 dihydrolipoamide S-acetyltransferase                                                |
| YGR244C            | [E] LSC2 succinate-CoA ligase beta subunit                                                   |
| YKL141W            | [E] SDH3 cytochrome b560 subunit of respiratory complex II                                   |
| YGR193C            | [E] PDX1 pyruvate dehydrogenase complex protein X                                            |
| YOR375C            | [G] GDH1 glutamate dehydrogenase (NADP+)                                                     |
| YFL018C            | [G] LPD1 dihydrolipoamide dehydrogenase precursor                                            |
| YAL062W            | [G] GDH3 NADP-glutamate dehydrogenase                                                        |
| YML022W            | [M] APT1 adenine phosphoribosyltransferase                                                   |
| YOR196C            | [M] LIP5 lipoic acid synthase                                                                |
| YDR441C            | [M] APT2 adenine phosphoribosyltransferase                                                   |
| YPL017C            | [M] YPL017c strong similarity to LPD1P and other dihydrolipoamide dehydrogenases             |
| YPL091W            | [R] GLR1 glutathione reductase (NADPH)                                                       |
| YJL046W            | [U] YJL046w similarity to E.coli lipoate-protein ligase A                                    |
| <b>Q-clique 36</b> | <b>Function Annotation</b>                                                                   |
| YGL211W            | [U] YGL211w similarity to M.jannaschii hypothetical proteins MJ1157 and MJ1478               |
| YNR016C            | [M] ACC1 acetyl-CoA carboxylase                                                              |
| YNL026W            | [U] YNL026w similarity to S.pombe hypothetical protein                                       |
| YLR048W            | [P] RPS0B 40S ribosomal protein p40 homolog B                                                |
| YGR214W            | [P] RPS0A 40S ribosomal protein p40 homolog A                                                |
| YNL072W            | [M] RNH35 RNase H(35), a 35 kDa ribonuclease H                                               |
| YHR038W            | [P] FIL1 Killed in Mutagen, sensitive to Diepoxybutane and/or Mitomycin C                    |
| YDL193W            | [U] YDL193w similarity to N.crassa hypothetical 32 kDa protein                               |
| YMR101C            | [M] SRT1 cis-prenyltransferase homologue                                                     |
| YBR029C            | [M] CDS1 CDP-diacylglycerol synthase                                                         |
| YBR002C            | [F] RER2 cis-prenyltransferase, a key enzyme in dolichol synthesis                           |
| <b>Q-clique 37</b> | <b>Function Annotation</b>                                                                   |
| YGL018C            | [F] JAC1 molecular chaperone                                                                 |
| YOR226C            | [M] ISU2 strong similarity to nitrogen fixation proteins                                     |
| YPR067W            | [A] ISA2 mitochondrial protein required for iron metabolism                                  |
| YPR033C            | [P] HTS1 histidine--tRNA ligase, mitochondrial                                               |
| YPL252C            | [U] YAH1 similarity to adrenodoxin and ferredoxin                                            |
| YLR231C            | [M] YLR231c strong similarity to rat kynureninase                                            |
| YPL135W            | [M] ISU1 strong similarity to nitrogen fixation protein (nifU)                               |
| YCL017C            | [A] NFS1 regulates Iron-Sulfur cluster proteins, cellular Iron uptake, and Iron distribution |
| YKL067W            | [M] YNK1 nucleoside diphosphate kinase                                                       |
| YDR283C            | [P] GCN2 ser/thr protein kinase                                                              |
| YLL027W            | [A] ISA1 mitochondrial protein required for normal iron metabolism                           |
| <b>Q-clique 38</b> | <b>Function Annotation</b>                                                                   |
| YBR272C            | [D] HSM3 mismatch repair protein                                                             |
| YOR261C            | [F] RPN8 26S proteasome regulatory subunit                                                   |
| YER021W            | [F] RPN3 26S proteasome regulatory subunit                                                   |
| YDR394W            | [F] RPT3 26S proteasome regulatory subunit                                                   |
| YDL007W            | [F] RPT2 26S proteasome regulatory subunit                                                   |
| YFR004W            | [F] RPN11 26S proteasome regulatory subunit                                                  |
| YOR259C            | [F] RPT4 26S proteasome regulatory subunit                                                   |
| YDL097C            | [F] RPN6 subunit of the regulatory particle of the proteasome                                |
| YOR117W            | [F] RPT5 26S proteasome regulatory subunit                                                   |

|                    |                                                                                                                                |
|--------------------|--------------------------------------------------------------------------------------------------------------------------------|
| YGL048C            | [F] RPT6 26S proteasome regulatory subunit                                                                                     |
| YPR108W            | [F] RPN7 subunit of the regulatory particle of the proteasome                                                                  |
| YDL147W            | [F] RPN5 subunit of the regulatory particle of the proteasome                                                                  |
| YHR200W            | [F] RPN10 26S proteasome regulatory subunit                                                                                    |
| YDR427W            | [F] RPN9 subunit of the regulatory particle of the proteasome                                                                  |
| YKL145W            | [F] RPT1 26S proteasome regulatory subunit                                                                                     |
| YGR232W            | [F] NAS6 possible homolog of human 26S proteasome regulatory subunit p28                                                       |
| YJR109C            | [G] CPA2 arginine-specific carbamoylphosphate synthase, large chain                                                            |
| YKL104C            | [M] GFA1 glucosamine--fructose-6-phosphate transaminase                                                                        |
| YLR421C            | [U] RPN13 weak similarity to human 42K membrane glycoprotein                                                                   |
| <b>Q-clique 39</b> | <b>Function Annotation</b>                                                                                                     |
| YGR135W            | [F] PRE9 20S proteasome subunit Y13 (alpha3)                                                                                   |
| YER012W            | [F] PRE1 20S proteasome subunit C11(beta4)                                                                                     |
| YMR314W            | [F] PRE5 20S proteasome subunit(alpha6)                                                                                        |
| YOR362C            | [F] PRE10 20S proteasome subunit C1 (alpha7)                                                                                   |
| YPR103W            | [F] PRE2 20S proteasome subunit (beta5)                                                                                        |
| YER094C            | [F] PUP3 20S proteasome subunit (beta3)                                                                                        |
| YGR253C            | [F] PUP2 20S proteasome subunit(alpha5)                                                                                        |
| YOL038W            | [F] PRE6 20S proteasome subunit (alpha4)                                                                                       |
| YML092C            | [F] PRE8 20S proteasome subunit Y7 (alpha2)                                                                                    |
| YBL041W            | [F] PRE7 20S proteasome subunit(beta6)                                                                                         |
| YGL011C            | [F] SCL1 20S proteasome subunit YC7ALPHA/Y8 (alpha1)                                                                           |
| YFR050C            | [F] PRE4 20S proteasome subunit(beta7)                                                                                         |
| YJL001W            | [F] PRE3 20S proteasome subunit (beta1)                                                                                        |
| <b>Q-clique 40</b> | <b>Function Annotation</b>                                                                                                     |
| YBR002C            | [F] RER2 cis-prenyltransferase, a key enzyme in dolichol synthesis                                                             |
| YBR029C            | [M] CDS1 CDP-diacylglycerol synthase                                                                                           |
| YNL072W            | [M] RNH35 RNase H(35), a 35 kDa ribonuclease H                                                                                 |
| YMR101C            | [M] SRT1 cis-prenyltransferase homologue                                                                                       |
| YNR016C            | [M] ACC1 acetyl-CoA carboxylase                                                                                                |
| YER087W            | [P] YER087w similarity to E.coli prolyl-tRNA synthetase                                                                        |
| YLR048W            | [P] RPS0B 40S ribosomal protein p40 homolog B                                                                                  |
| YHR020W            | [P] YHR020w strong similarity to human glutamyl-prolyl-tRNA synthetase and fruit fly multifunctional aminoacyl-tRNA synthetase |
| YHR038W            | [P] FIL1 Killed in Mutagen, sensitive to Diepoxybutane and/or Mitomycin C                                                      |
| YHL004W            | [P] MRP4 ribosomal protein of the small subunit, mitochondrial                                                                 |
| YGR214W            | [P] RPS0A 40S ribosomal protein p40 homolog A                                                                                  |
| YNL026W            | [U] YNL026w similarity to S.pombe hypothetical protein                                                                         |
| YDL193W            | [U] YDL193w similarity to N.crassa hypothetical 32 kDa protein                                                                 |
| YGL211W            | [U] YGL211w similarity to M.jannaschii hypothetical proteins MJ1157 and MJ1478                                                 |
| <b>Q-clique 41</b> | <b>Function Annotation</b>                                                                                                     |
| YJL046W            | [U] YJL046w similarity to E.coli lipoate-protein ligase A                                                                      |
| YMR118C            | [E] YMR118c strong similarity to succinate dehydrogenase                                                                       |
| YIL125W            | [E] KGD1 2-oxoglutarate dehydrogenase complex E1 component                                                                     |
| YOR142W            | [E] LSC1 succinate-CoA ligase alpha subunit                                                                                    |
| YLL041C            | [E] SDH2 succinate dehydrogenase iron-sulfur protein subunit                                                                   |
| YGR244C            | [E] LSC2 succinate-CoA ligase beta subunit                                                                                     |
| YGR193C            | [E] PDX1 pyruvate dehydrogenase complex protein X                                                                              |
| YNL071W            | [E] LAT1 dihydrolipoamide S-acetyltransferase                                                                                  |
| YER178W            | [E] PDA1 pyruvate dehydrogenase (lipoamide) alpha chain precursor                                                              |
| YDR148C            | [E] KGD2 2-oxoglutarate dehydrogenase complex E2 component                                                                     |
| YOR196C            | [M] LIP5 lipoic acid synthase                                                                                                  |
| YFL018C            | [G] LPD1 dihydrolipoamide dehydrogenase precursor                                                                              |
| YKL141W            | [E] SDH3 cytochrome b560 subunit of respiratory complex II                                                                     |
| <b>Q-clique 42</b> | <b>Function Annotation</b>                                                                                                     |

|                    |                                                                                                                                                    |
|--------------------|----------------------------------------------------------------------------------------------------------------------------------------------------|
| YCR003W            | [P] MRPL32 ribosomal protein YmL32, mitochondrial                                                                                                  |
| YPL231W            | [M] FAS2 fatty-acyl-CoA synthase, alpha chain                                                                                                      |
| YKL182W            | [M] FAS1 fatty-acyl-CoA synthase, beta chain                                                                                                       |
| YJR057W            | [M] CDC8 dTMP kinase                                                                                                                               |
| YMR262W            | [D] YMR262w similarity to S.pombe scn1 protein                                                                                                     |
| YOR221C            | [M] MCT1 malonyl-CoA:ACP transferase                                                                                                               |
| YJR148W            | [G] BAT2 branched chain amino acid aminotransferase, cytosolic                                                                                     |
| YHR208W            | [G] BAT1 branched chain amino acid aminotransferase, mitochondrial                                                                                 |
| YER061C            | [E] CEM1 beta-keto-acyl-ACP synthase, mitochondrial                                                                                                |
| YDR454C            | [M] GUK1 guanylate kinase                                                                                                                          |
| YKL192C            | [M] ACP1 mitochondrial acyl-carrier protein                                                                                                        |
| YBL055C            | [U] YBL055c similarity to hypothetical S.pombe protein                                                                                             |
| <b>Q-clique 43</b> | <b>Function Annotation</b>                                                                                                                         |
| YNL262W            | [D] POL2 DNA-directed DNA polymerase epsilon, catalytic subunit A                                                                                  |
| YMR290C            | [D] HAS1 helicase associated with SET1P                                                                                                            |
| YAL035W            | [P] FUN12 general translation factor eIF2 homolog                                                                                                  |
| YGR162W            | [P] TIF4631 mRNA cap-binding protein (eIF4F), 150K subunit                                                                                         |
| YOL139C            | [P] CDC33 translation initiation factor eIF4E                                                                                                      |
| YGL049C            | [P] TIF4632 mRNA cap-binding protein (eIF4F), 130K subunit                                                                                         |
| YDL051W            | [T] LHP1 RNA binding protein                                                                                                                       |
| YLR175W            | [T] CBF5 putative rRNA pseuduridine synthase                                                                                                       |
| YOR310C            | [T] NOP58 required for pre-18S rRNA processing                                                                                                     |
| YPL043W            | [T] NOP4 nucleolar protein                                                                                                                         |
| YLR197W            | [T] SIK1 involved in pre-rRNA processing                                                                                                           |
| YGL120C            | [T] PRP43 involved in spliceosome disassembly                                                                                                      |
| YOL041C            | [U] NOP12 weak similarity to M.sativa NUM1, hnRNP protein from C. tentans and D. melanogaster, murine/bovine poly(A) binding protein II, and NSR1P |
| YBL004W            | [U] YBL004w weak similarity to Papaya ringspot virus polyprotein                                                                                   |
| YDL213C            | [U] FYV14 weak similarity to potato small nuclear ribonucleoprotein U2B and human splicing factor homolog                                          |
| YGR145W            | [U] YGR145w similarity to C.elegans hypothetical protein                                                                                           |
| YDR496C            | [U] PUF6 similarity to hypothetical human and C.elegans proteins                                                                                   |
| YKL014C            | [U] YKL014c similarity to hypothetical protein SPCC14G10.02 S. pombe                                                                               |
| YPL012W            | [U] RRP12 hypothetical protein                                                                                                                     |
| <b>Q-clique 44</b> | <b>Function Annotation</b>                                                                                                                         |
| YDR292C            | [F] SRP101 signal recognition particle receptor, alpha chain                                                                                       |
| YML094W            | [F] GIM5 Gim complex component                                                                                                                     |
| YJL189W            | [P] RPL39 60S large subunit ribosomal protein L39.e                                                                                                |
| YLR406C            | [P] RPL31B 60S large subunit ribosomal protein L31.e.c12                                                                                           |
| YMR242C            | [P] RPL20A 60s large subunit ribosomal protein                                                                                                     |
| YOL121C            | [P] RPS19A 40S small subunit ribosomal protein S19.e                                                                                               |
| YNL302C            | [P] RPS19B 40S small subunit ribosomal protein S19.e                                                                                               |
| YDL075W            | [P] RPL31A 60S large subunit ribosomal protein L31.e                                                                                               |
| YOR312C            | [P] RPL20B 60S large subunit ribosomal protein                                                                                                     |
| YPR016C            | [P] TIF6 translation initiation factor 6 (eIF6)                                                                                                    |
| YMR074C            | [U] YMR074c strong similarity to hypothetical S. pombe protein                                                                                     |
| <b>Q-clique 45</b> | <b>Function Annotation</b>                                                                                                                         |
| YGR240C            | [E] PFK1 6-phosphofructokinase, alpha subunit                                                                                                      |
| YJR109C            | [G] CPA2 arginine-specific carbamoylphosphate synthase, large chain                                                                                |
| YDR007W            | [G] TRP1 phosphoribosylanthranilate isomerase                                                                                                      |
| YDR127W            | [G] ARO1 arom pentafunctional enzyme                                                                                                               |
| YER090W            | [G] TRP2 anthranilate synthase component I                                                                                                         |
| YKL211C            | [G] TRP3 anthranilate synthase component II                                                                                                        |
| YNR033W            | [M] ABZ1 para-aminobenzoate synthase                                                                                                               |
| YKL104C            | [M] GFA1 glucosamine--fructose-6-phosphate transaminase                                                                                            |



|                    |                                                                                                                 |
|--------------------|-----------------------------------------------------------------------------------------------------------------|
| YMR012W            | [P] CLU1 translation initiation factor eIF3 (p135 subunit)                                                      |
| YGL245W            | [P] YGL245w strong similarity to glutamine--tRNA ligase                                                         |
| <b>Q-clique 46</b> | <b>Function Annotation</b>                                                                                      |
| YML094W            | [F] GIM5 Gim complex component                                                                                  |
| YDR292C            | [F] SRP101 signal recognition particle receptor, alpha chain                                                    |
| YMR242C            | [P] RPL20A 60s large subunit ribosomal protein                                                                  |
| YOL121C            | [P] RPS19A 40S small subunit ribosomal protein S19.e                                                            |
| YOR312C            | [P] RPL20B 60S large subunit ribosomal protein                                                                  |
| YDL075W            | [P] RPL31A 60S large subunit ribosomal protein L31.e                                                            |
| YPR016C            | [P] TIF6 translation initiation factor 6 (eIF6)                                                                 |
| YNL302C            | [P] RPS19B 40S small subunit ribosomal protein S19.e                                                            |
| YJL189W            | [P] RPL39 60S large subunit ribosomal protein L39.e                                                             |
| YLR406C            | [P] RPL31B 60S large subunit ribosomal protein L31.e.c12                                                        |
| YMR074C            | [U] YMR074c strong similarity to hypothetical S. pombe protein                                                  |
| <b>Q-clique 47</b> | <b>Function Annotation</b>                                                                                      |
| YMR089C            | [F] YTA12 protease of the SEC18/CDC48/PAS1 family of ATPases (AAA)                                              |
| YER017C            | [F] AFG3 protease of the SEC18/CDC48/PAS1 family of ATPases (AAA)                                               |
| YPR024W            | [F] YME1 protease of the SEC18/CDC48/PAS1 family of ATPases (AAA)                                               |
| YER090W            | [G] TRP2 anthranilate synthase component I                                                                      |
| YDR007W            | [G] TRP1 phosphoribosylanthranilate isomerase                                                                   |
| YGL026C            | [G] TRP5 tryptophan synthase                                                                                    |
| YKL211C            | [G] TRP3 anthranilate synthase component II                                                                     |
| YNR033W            | [M] ABZ1 para-aminobenzoate synthase                                                                            |
| YOR241W            | [M] MET7 tetrahydrofolylpolyglutamate synthase                                                                  |
| YMR113W            | [M] FOL3 dihydrofolate synthetase                                                                               |
| YMR278W            | [M] YMR278w similarity to phosphomannomutases                                                                   |
| YNL256W            | [M] FOL1 Dihydroneopterin aldolase, dihydro-6-hydroxymethylpterin pyrophosphokinase, dihydropteroate synthetase |
| YGR267C            | [M] FOL2 GTP cyclohydrolase I                                                                                   |
| YEL058W            | [M] PCM1 phosphoacetylglucosamine mutase                                                                        |
| YKL132C            | [M] RMA1 similarity to B.subtilis folC protein and strong similarity to YMR113w                                 |
| <b>Q-clique 48</b> | <b>Function Annotation</b>                                                                                      |
| YBR002C            | [F] RER2 cis-prenyltransferase, a key enzyme in dolichol synthesis                                              |
| YDL142C            | [M] CRD1 cardiolipin synthase                                                                                   |
| YBR042C            | [M] CST26 weak similarity to 1-acyl-sn-glycerol-3-phosphate acyltransferase from Brassica napus                 |
| YMR101C            | [M] SRT1 cis-prenyltransferase homologue                                                                        |
| YPR113W            | [M] PIS1 CDP diacylglycerol--inositol 3-phosphatidyltransferase                                                 |
| YNR016C            | [M] ACC1 acetyl-CoA carboxylase                                                                                 |
| YNL072W            | [M] RNH35 RNase H(35), a 35 kDa ribonuclease H                                                                  |
| YBR029C            | [M] CDS1 CDP-diacylglycerol synthase                                                                            |
| YDL052C            | [M] SLC1 fatty acyltransferase                                                                                  |
| YLR048W            | [P] RPS0B 40S ribosomal protein p40 homolog B                                                                   |
| YHR038W            | [P] FIL1 Killed in Mutagen, sensitive to Diepoxybutane and/or Mitomycin C                                       |
| YGR214W            | [P] RPS0A 40S ribosomal protein p40 homolog A                                                                   |
| YNL026W            | [U] YNL026w similarity to S.pombe hypothetical protein                                                          |
| YDL193W            | [U] YDL193w similarity to N.crassa hypothetical 32 kDa protein                                                  |
| YDR018C            | [U] YDR018c strong similarity to hypothetical protein YBR042c                                                   |

Note: All quasi-cliques and their members along with function annotation (48 quasi-cliques and 511 proteins in total) are listed above. Q-clique N: the No. of quasi-cliques.
